# Supplementary material for: Mechanistic signatures of HPV insertions in cervical carcinomas
Source: PubMed Central journal article supplement (PMC5685317; doi:10.1038/npjgenmed.2016.4), 2016-03-16

Fig S5

### Case 6 (2J-COL)

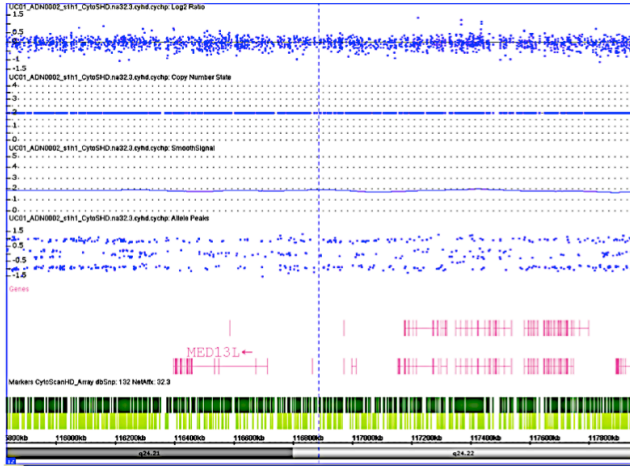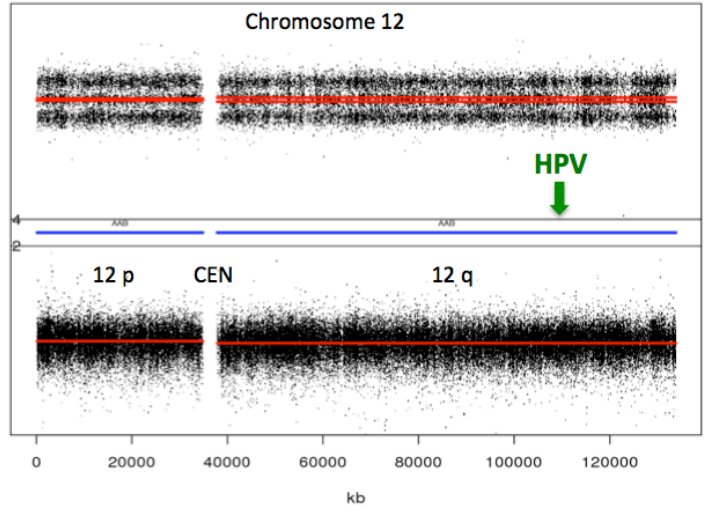

### Case 7 (2J-COL)

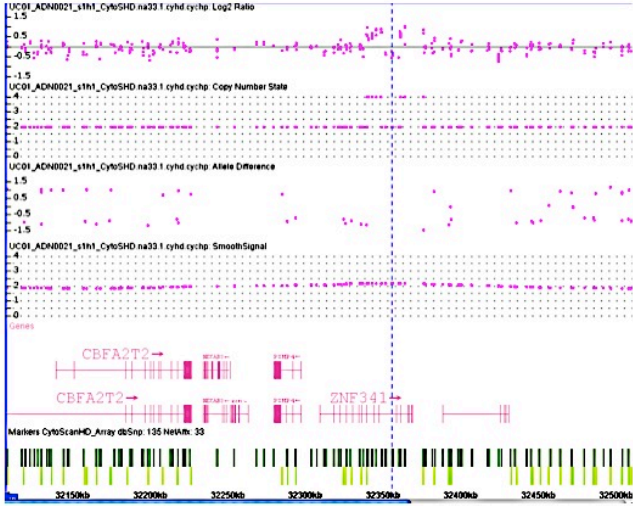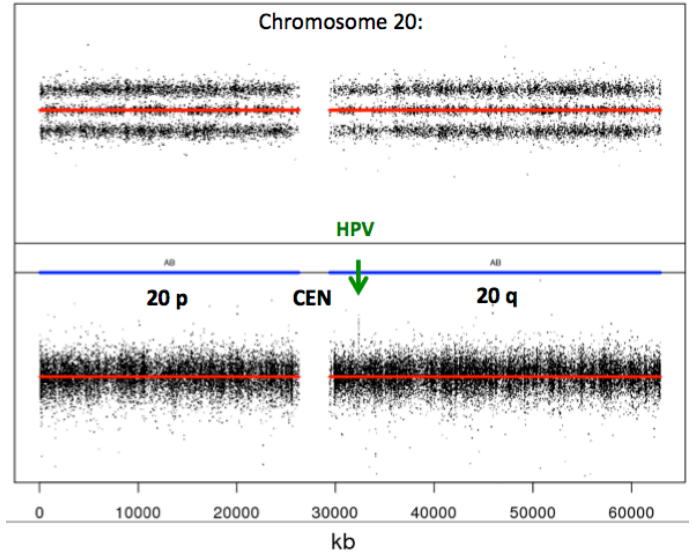

### Case 8 (2J-COL)

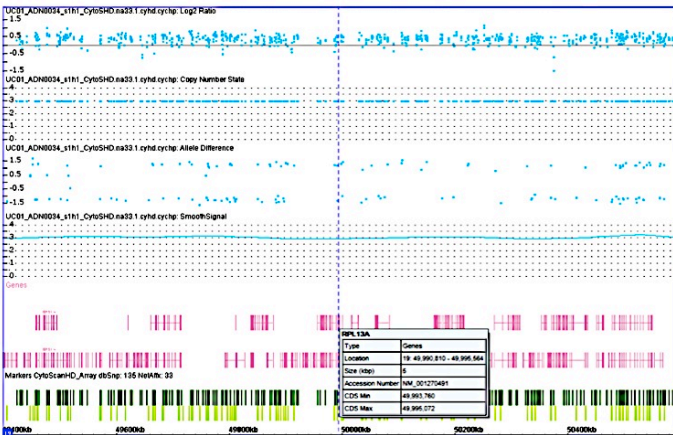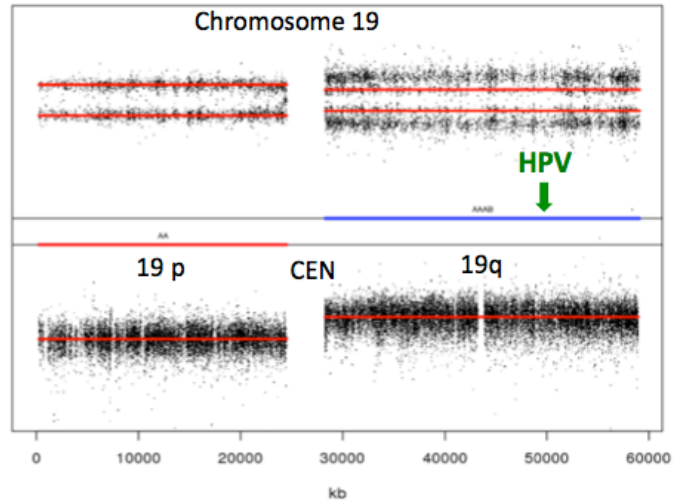

Fig S5

### Case 126 (2J-COL)

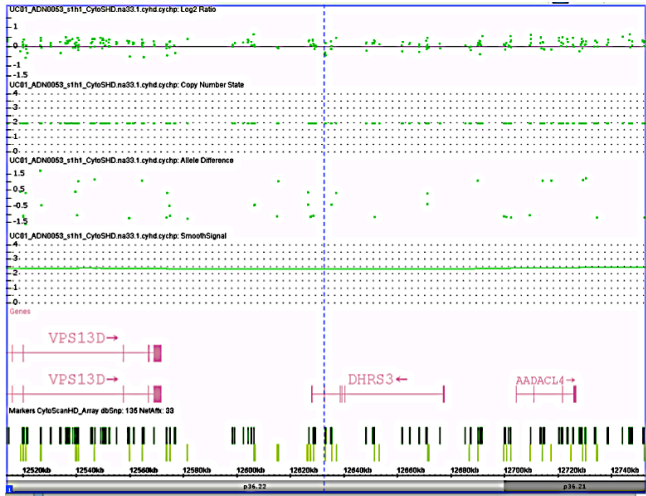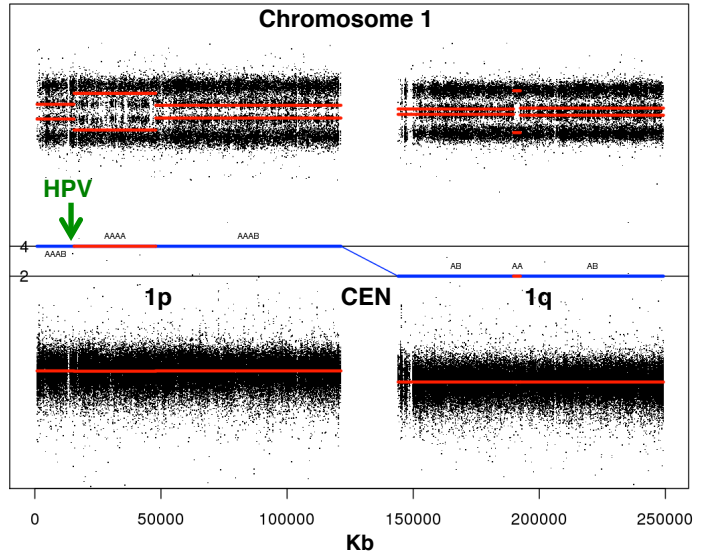

### Case 208 (2J-COL)

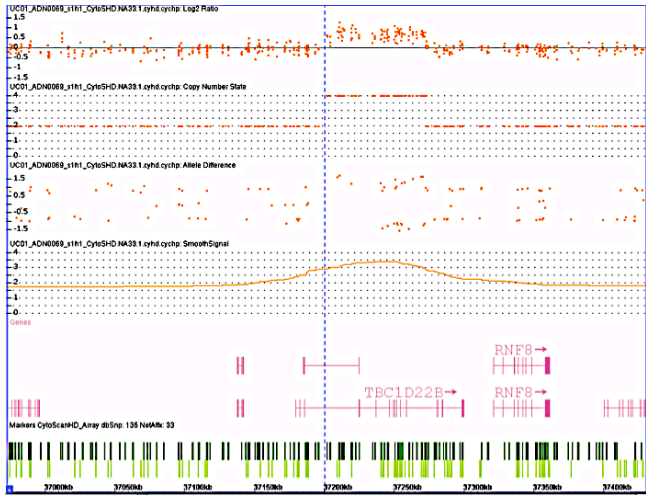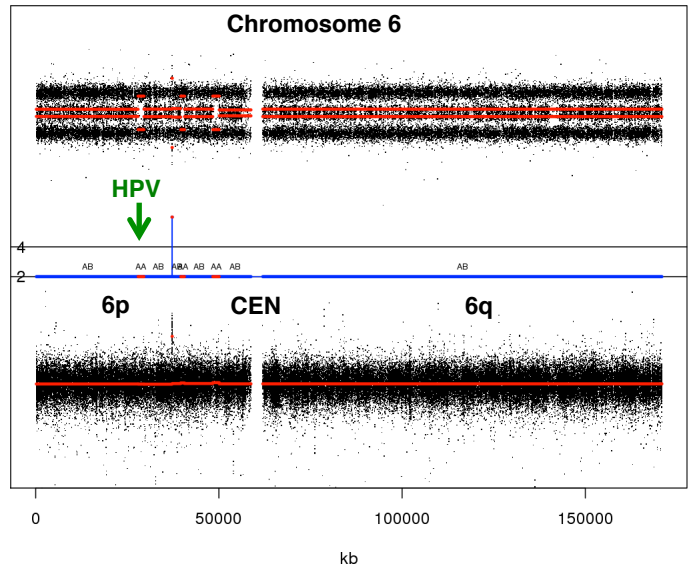

# Case 1 (2J-COL)

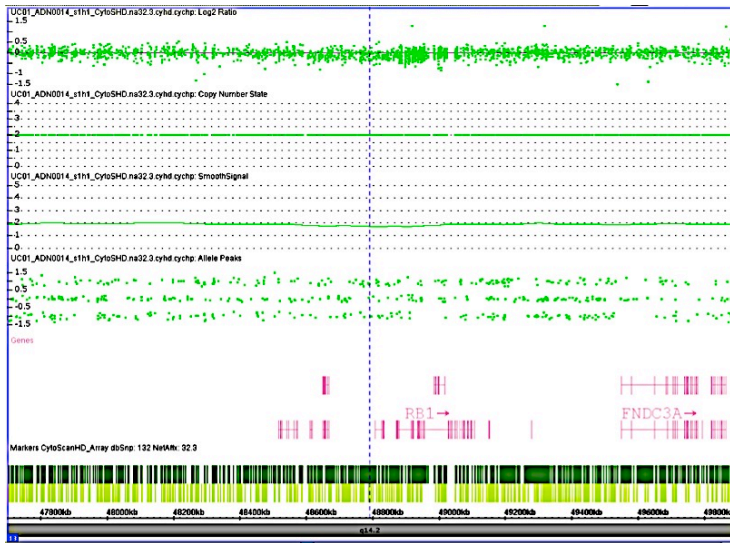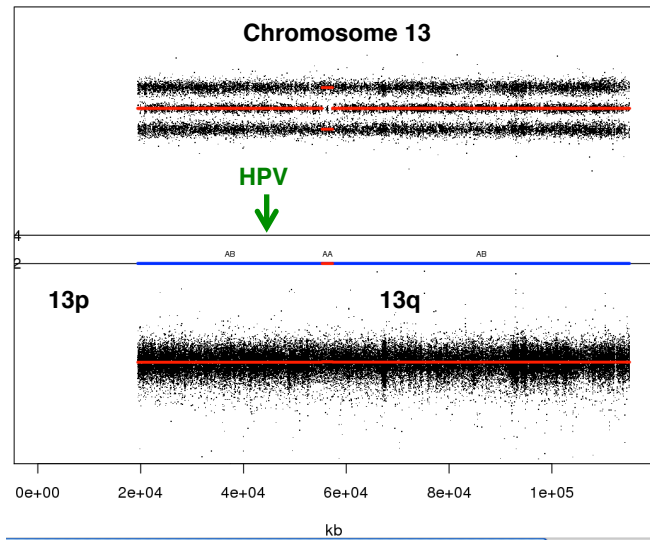

# Case 4 (2J-COL)

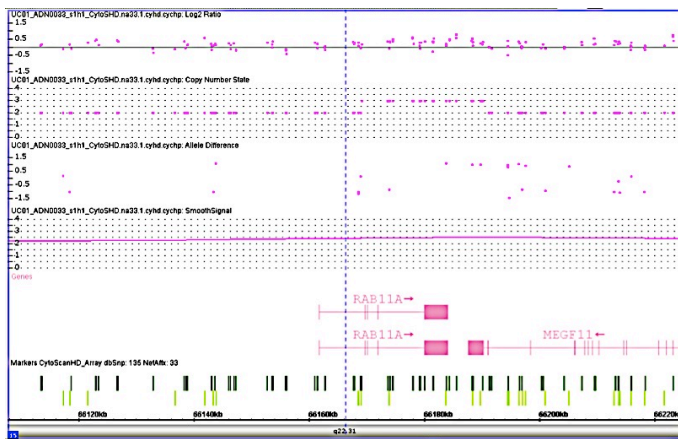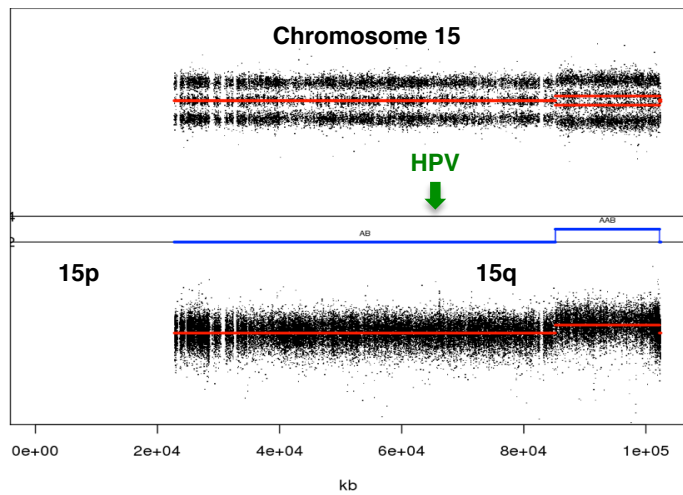

# Case 17 (2J-COL)

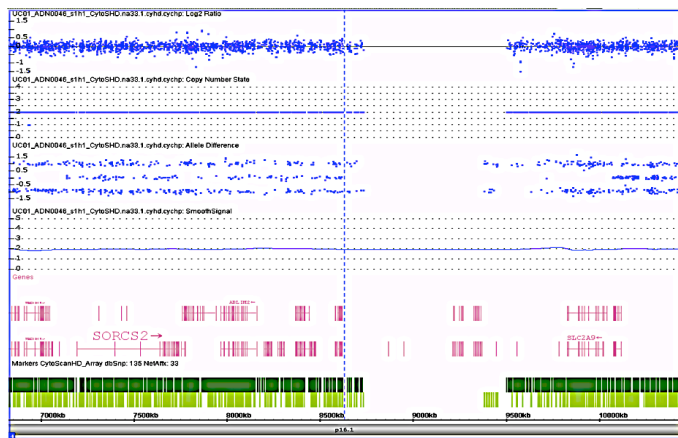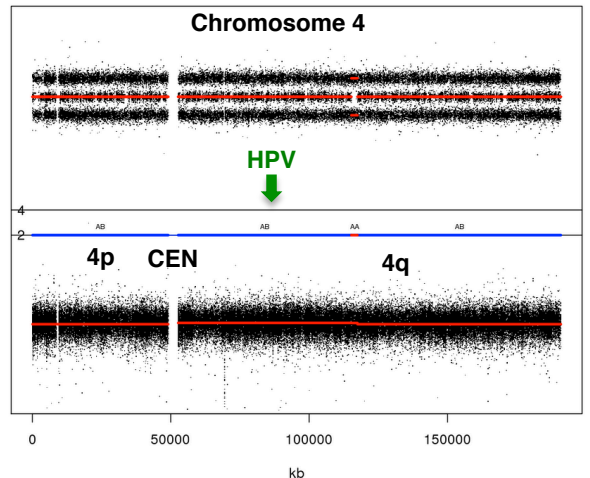

Supplement: npjgenmed20164-s7.pdf [file npjgenmed20164-s7.pdf]
