# Supplementary material for: Mechanistic signatures of HPV insertions in cervical carcinomas
Source: PubMed Central journal article supplement (PMC5685317; doi:10.1038/npjgenmed.2016.4), 2016-03-16

Fig S6

Case 9 (2J-NL)

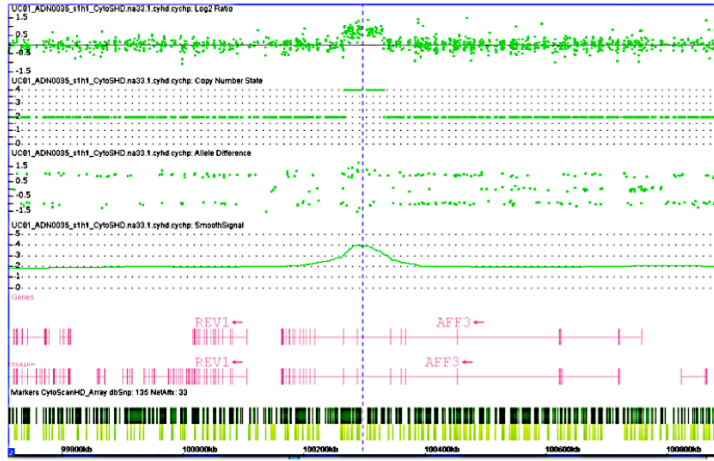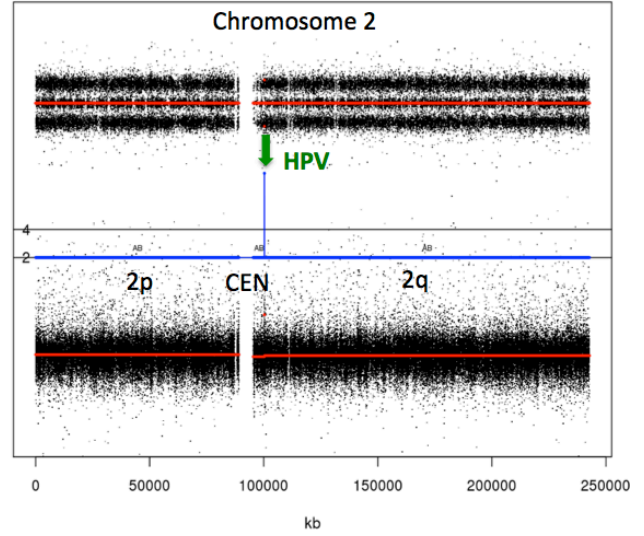

Case 14 (2J-NL)

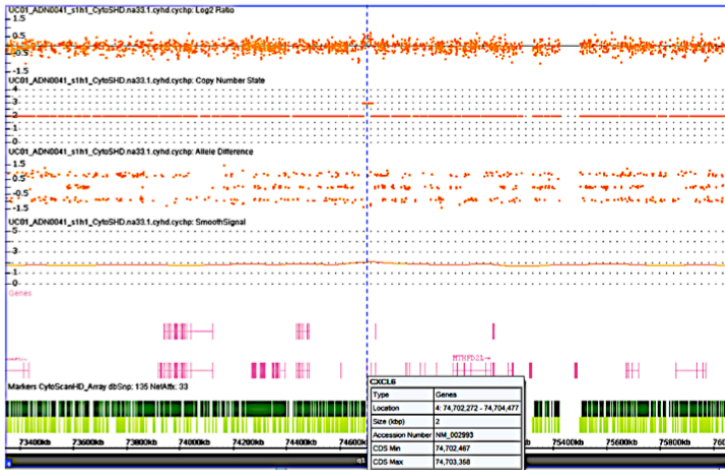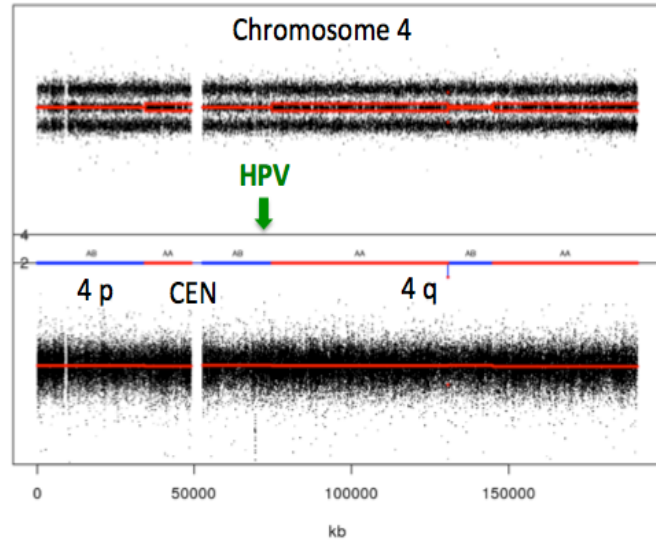

Case 18 (2J-NL)

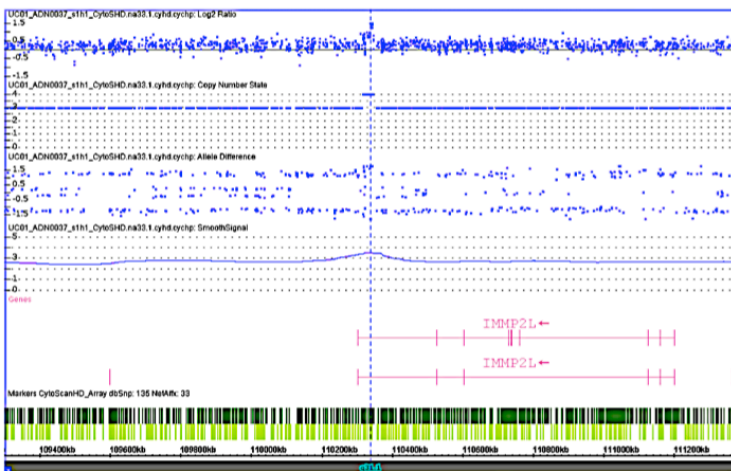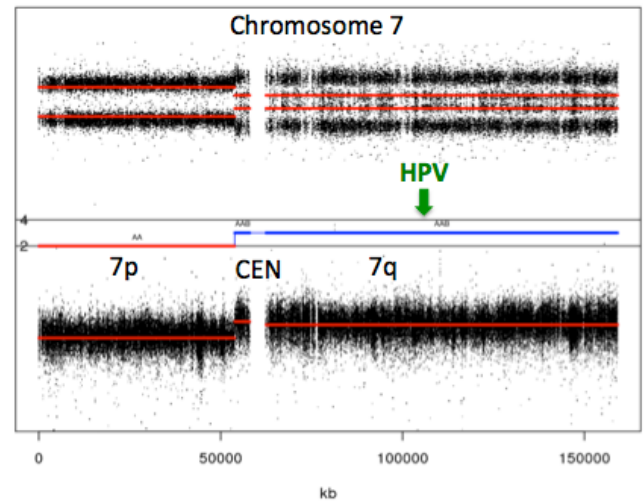

Fig S6

Case 10 (2J-NL)

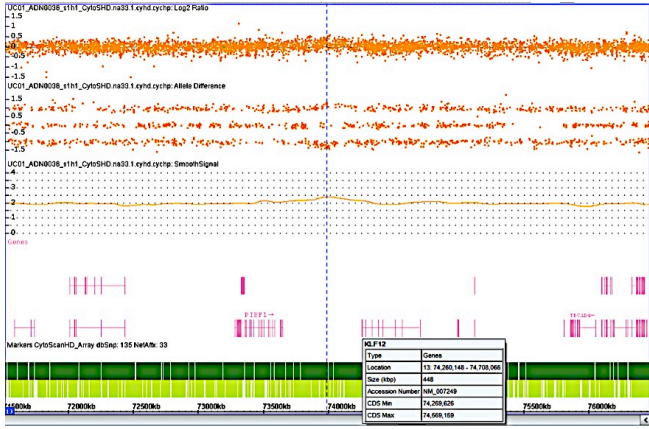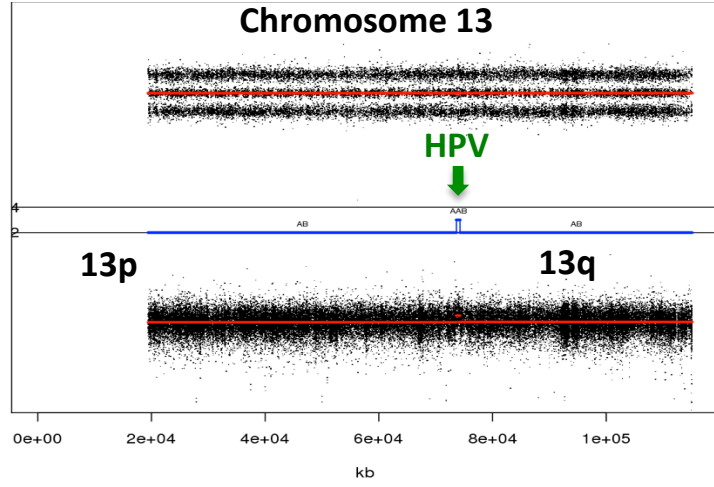

Case 12 (2J-NL)

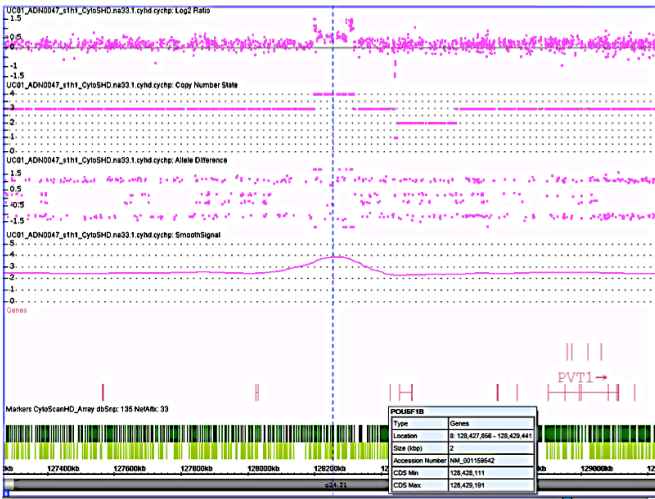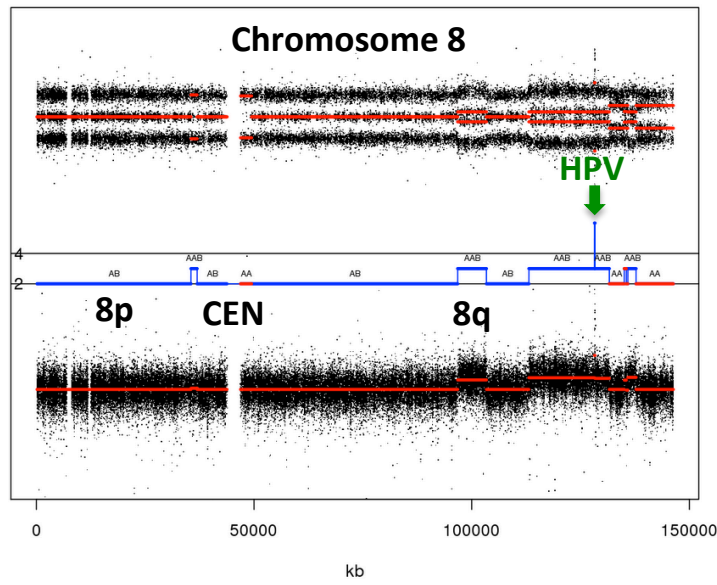

Case 15 (2J-NL)

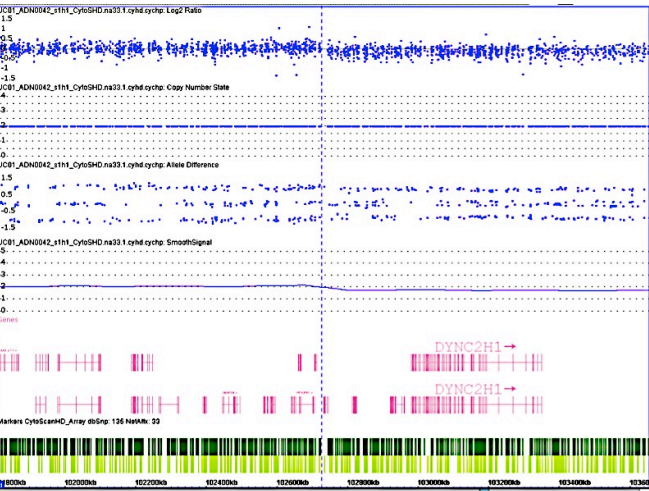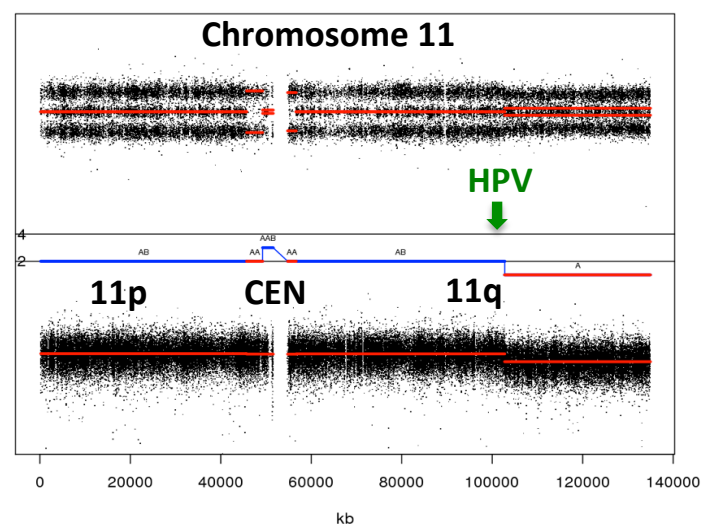

Fig S6

Case 16 (2J-NL)

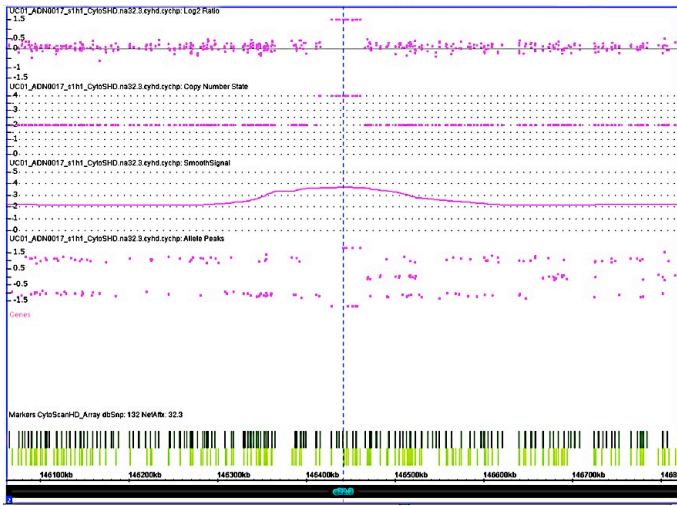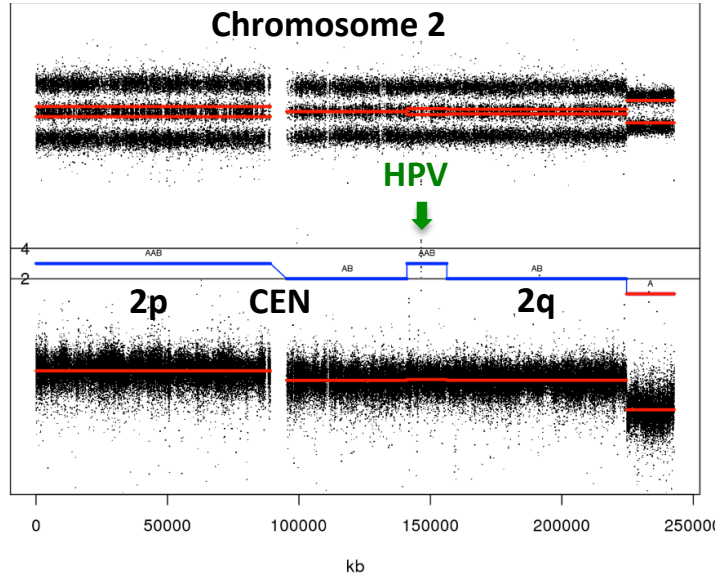

Case 20 (2J-NL)

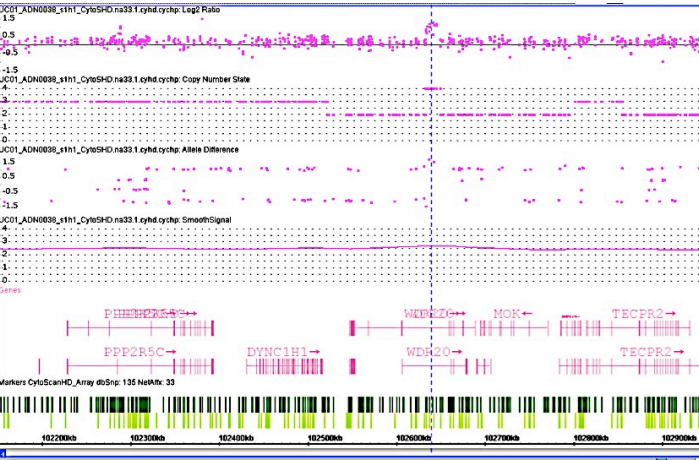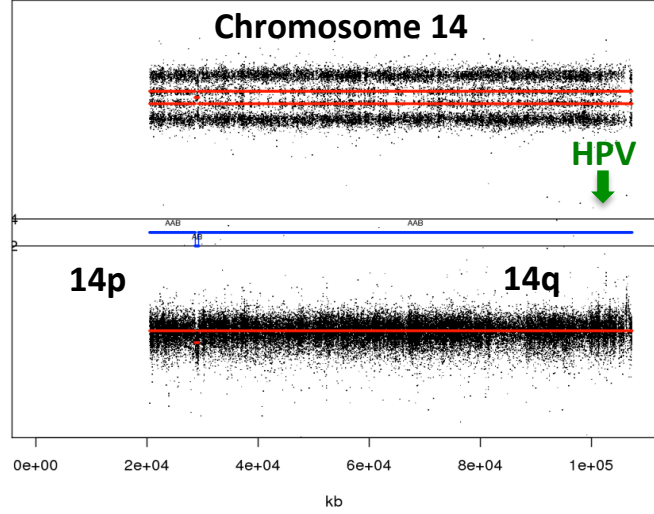

Case 82 (2J-NL)

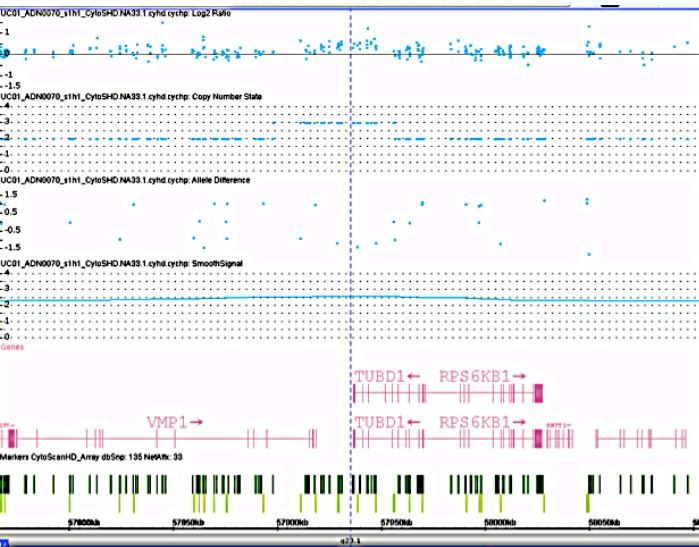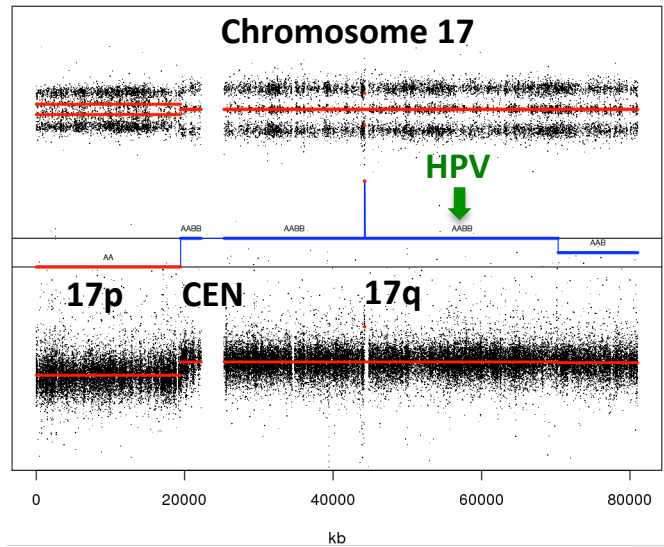

Fig S6

Case 87 (2J-NL)

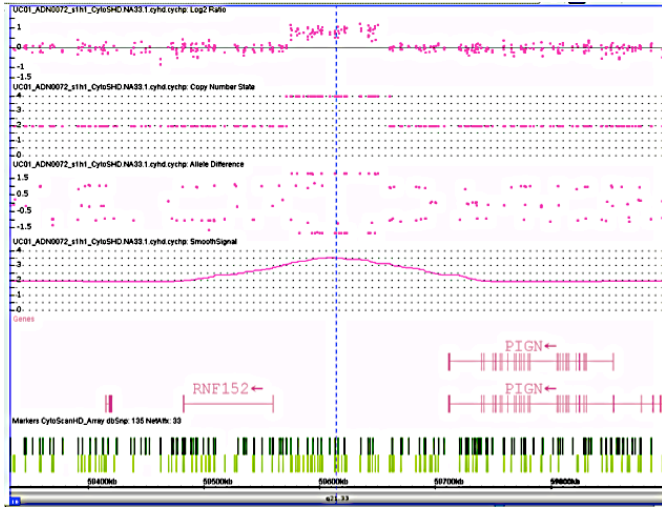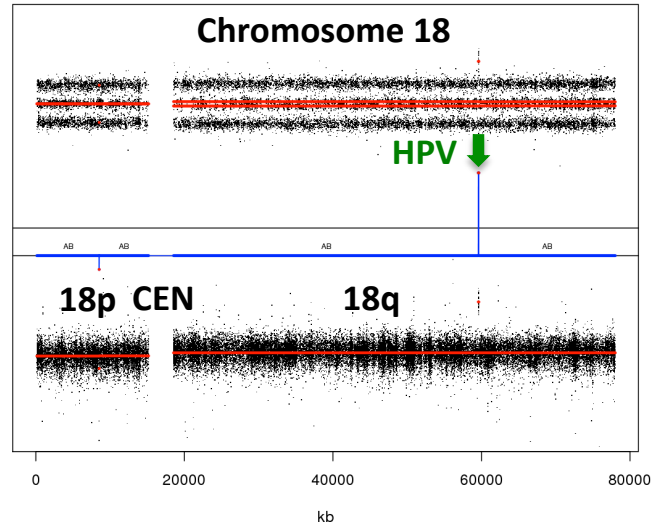

Case 205 (2J-NL)

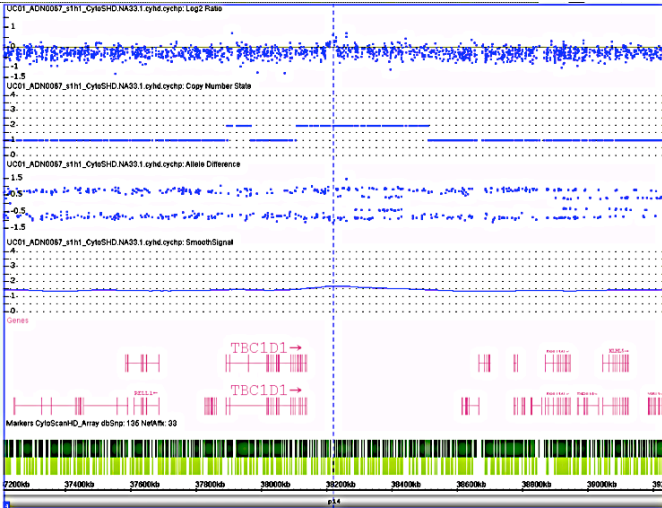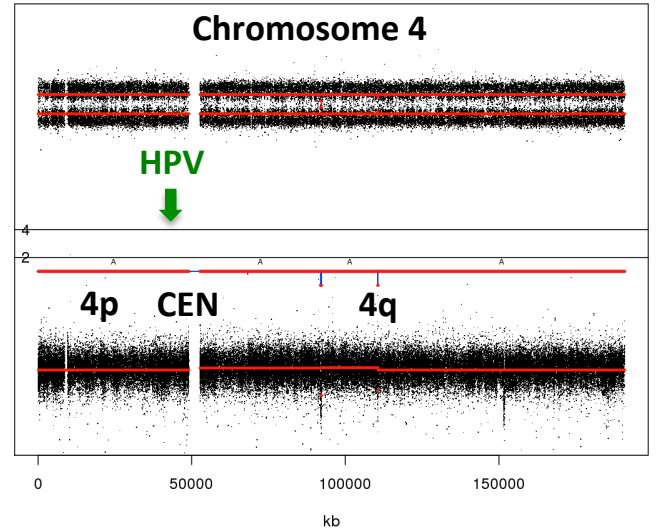

Case 143 (2J-NL)

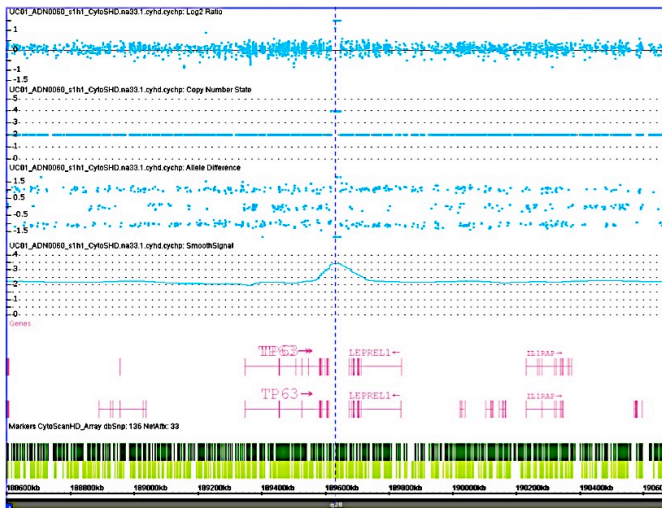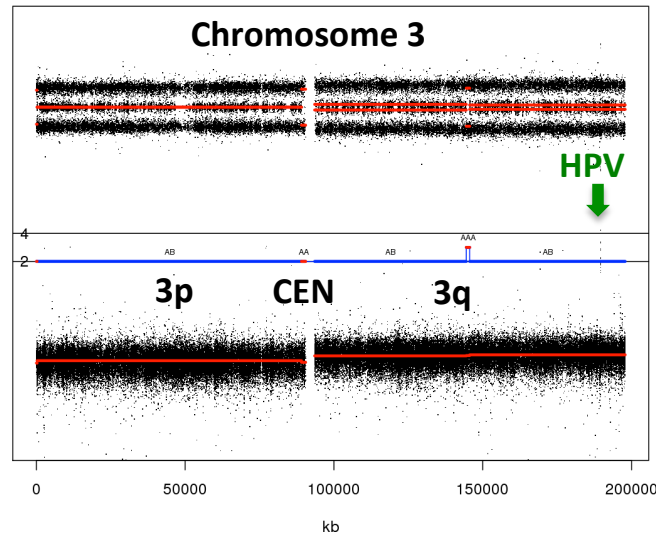

Fig S6

### Case 139 (2J-NL)

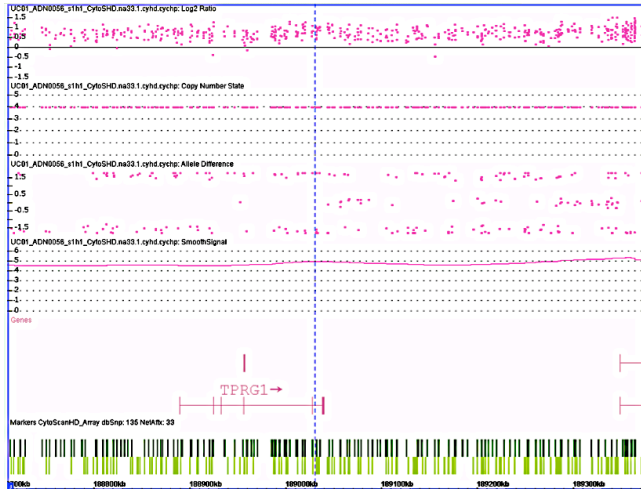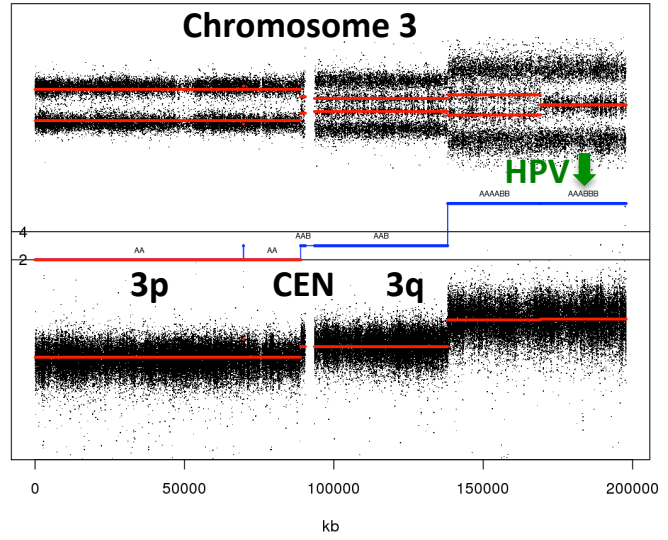

### Case 125 (2J-NL)

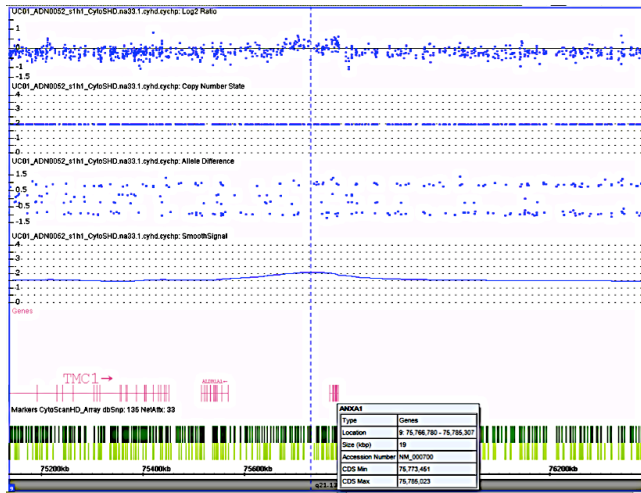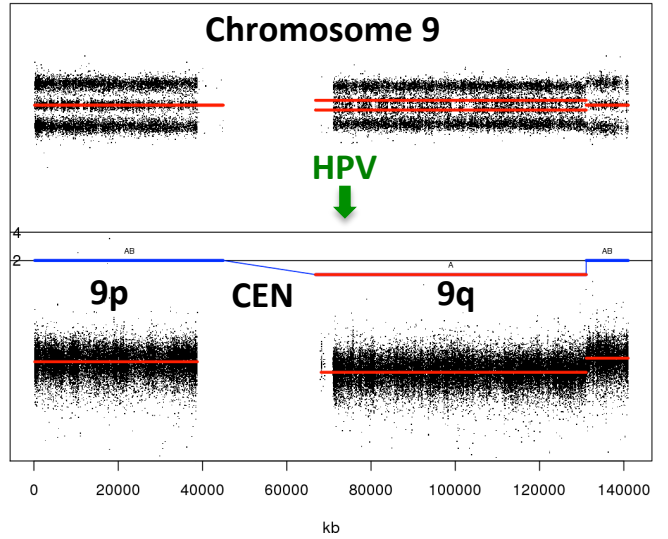

Supplement: npjgenmed20164-s8.pdf [file npjgenmed20164-s8.pdf]
