# Supplementary material for: Mechanistic signatures of HPV insertions in cervical carcinomas
Source: PubMed Central journal article supplement (PMC5685317; doi:10.1038/npjgenmed.2016.4), 2016-03-16
Supplement: npjgenmed20164-s4.pdf [file npjgenmed20164-s4.pdf]

Fig S2

Case 1 (2J-COL):

Junction 1: Chr13q14.2 (48, 993, 666) / HPV16 E4 (3584)

Chr13q14.2: TCCTTCAGTTCCTCTCTGACCTTGGTTATTTCTTATCTTCTGCTAGC  
HPV16 E4: TGCATTTAACAGCTCACACAAAGGACGGATTAAGTGAATAGTAACA  
Jx Chr13/HPV16: TCCTTCAGTTCCTCTCTGACCTTGACGGATTAAGTGAATAGTAACA

Junction 2: HPV16 E2 (3224) / Chr13q14.2 (48, 591, 279)

HPV16 E2: AGGGTCAAGTTGACTATTATGTTTATTATTATGTTTCATGAAGGAATA  
Chr13q14.2: CTCACATCTCTCCAGCACCTGTTTCTCCTGACTTTTAAATGATCG  
Jx HPV16/Chr13: AGGGTCAAGTTGACTATTATGTTTCTCCTGACTTTTAAATGATCG

Case 3 (2J-COL):

Junction 1: Chr1q44 (244,237,555) / HPV18 E4 (3605)

Chr1q44: ACAAGTCAACGGACTTGGGGACTGATGGGGCTGGGTGGCTGGCGGCAGGGT  
HPV18 E4: AGCAGCATTGTGACACTGTCAACCCACTTCTCGGTGCAGCTACACCTACAGGC  
Jx Chr1/HPV18: ACAAGTCAACGGACTTGCACCCACCTCCAAATACAACCCACTTCTCGGTGC

Junction 2: Chr1q44 (244, 436, 006) / HPV18 L2 (4258)

HPV18 E5: TAATAAAAGTATGGTATCCCAACCGTGCCGCACGACGCAAAACGGGCTTCGGTAA  
Chr1q44: TTAATCTCCAATGTGACAGTATTTGGAGGTGGGGCCTTTGGGGGATGATCAGG  
Jx HPV18/Chr1: TAATAAAAGTATGGTATCCCAACCGTGAGGTGGGGCCTTTGGGGGATGATCAGG

Case 17 (2J-COL):

Junction 1: Chr4p16.1 (8, 638, 831) / HPV18 E2 (3013)

Chr4p16.1: CTTTTATTAAAGTCTTATATTTCTAAATAACTTGGCTTTTATAGAGTTACCTGCT  
HPV18 E2: TTAACAACCAAGGTTGGTGCCAGCCTATAAATTTCAAAAAGTAAAGCAGATAA  
Jx Chr4/HPV18: CTTTTATTAAAGTCTTATATTTCTAAATAACTTTCAAAAAGTAAAGCAGATAA

Junction 2: HPV18 E1 (2289) / Chr4p16.1 (8,626,438)

HPV18 E1: GCAATTCCTGCGATACCAACAATAAGAGTTTATAACATTTTTAGGAGCCTT  
Chr4p16.1: TCTCCCTTCATCCTTGCCAACCTGGACATGTCTTCTTCTCTGTGACCC  
Jx HPV18/Chr4: GCAATTCCTGCGATACCAACAATAAGACATGTCTTCTTCTCTGTGACCC

Case 13 (2J-NL):

Junction 1: Chr13q22.1 (73,830,702) / HPV18 E2 (3802)

Chr13q22.1: GATTTCTCTCAGGAATGAAAGGAAGGAAACTAAAGGAGAGGAGACGGGA  
HPV18 E2: CACCTGGCATTGGACAGGTGCAGGCAATGAAAACAGGAATACTGACTGTA  
Jx Chr13/HPV18: GATTTCTCTCAGGAATGAAAGGAAGGAAAACAGGAATACTGACTGTA

Junction 2: Chr13q22.1 (74,152,642) / HPV18 E1 (1842)

HPV18 E1: TTAAGTACATTGTTACACGTACCTGAAACTTGTATGTTAATTCACCCACAAAA  
Chr13q22.1: TTTCAAATCTATTTTCTCCTCAGTGAGTTTCTTAAAAAAAATCTATTTCCGA  
Jx HPV18/Chr13: TTAAGTACATTGTTACACGTACCTGAAACTTCTTAAAAAAAATCTATTTCCGA

Case 2 (2J-COL):

Junction 1: ChrXp22.2 (13, 772, 242) / HPV16 LCR (7244)

ChrXp22.2: CAGCCTCCCCAGTAGCTGGGACTACAGGCACCCACCAACACGCCCGGCTA  
HPV16 LCR: TGTGCTTGTAAATATTAAGTTGATGTGTGTTTTGTATGTATGGTATAATAAAC  
Jx ChrX/HPV16: CAGCCTCCCCAGTAGCTGGGACTACATGTTTTGTATGTATGGTATAATAAAC

Junction 2: HPV16 E1 (1333) / ChrXp22.2 (13, 778, 432)

HPV16 E1: GCCATGAGACTGAAACACCATGTAGTCAGTATAGTGGTGAAGTGGGGGTG  
ChrXp22.2: ATCCAAGTGCATGGGTGGAGGGTAGTTCGCCGTGATTCGACCTTGAGTTTGT  
Jx HPV16/ChrX: GCCATGAGACTGAAACACCATGTAGTTCGCCGTGATTCTGACCTTGAGTTTGT

Case 5 (2J-COL):

Junction 1: Chr4q21.3 (87,581,814) / HPV16 L2 (5427)

Chr4q21.3: TGTTCAGGGAACAATCGGTAATTTACACAGITCAAACACATTTAACTTAA  
HPV16 L2: CATCTTTATCAGGTTATATTCTCGCAAAATACAACAATTCCTTTTGGTGGTGCAT  
Jx Chr4/HPV16: TGTTCAGGGAACAATCGGTAATTTGTACAACAATTCCTTTTGGTGGTGCAT

Junction 2: Chr4q21.3 (87,230,060) / HPV16 E1 (2410)

HPV16 E1: CCATTTTGGTTTACAACCATTAGCAGATGCCAAAATAGGTATGTTAGATGATGCTA  
Chr4q21.3: ATTCATCACCATTATTGAGATTTTTAGTATTTATGAAATGAAATGAAGTTTACTGAAT  
Jx HPV16/Chr4: CCATTTTGGTTTACAACCATTAGCAGATGTATGAAATGAAATGAAGTTTACTGAAT

Case 11 (2J-NL):

Junction 1: Chr6q21 (113,335,611) / HPV18 E5 (3861)

Chr6q21: GGCTCCTTAGCACATTTCACTGCTGTAATTTTCGTCTTTTGTCTTTTGT  
HPV18 E5: AGTGAAACACAAAGAACAAAATTTTAAATACTGTTGCAATTCAGATAGTGTAC  
Jx Chr6/HPV18: GGCTCCTTAGCACATTTCACTGCTGTAATACTGTTGCAATTCAGATAGTGTAC

Junction 2: Chr6q21 (113,390,769) / HPV18 E4 (3612)

HPV18 E4: AAGCAGCATTGTGGACCTGTCAACCCACTTCTCGGTGCAGCTACACCTACAGGCA  
Chr6q21: TGTTTTTATTAGTCGCGTGAGATGGACGAATACCCGTTTAGGTTTTTTCTTTT  
Jx HPV18/Chr6: AAGCAGCATTGTGGACCTGTCAACCCACAATACCCGTTTAGGTTTTTTCTTTT

Case 19 (2J-NL):

Junction 1: Chr7p21.1 (17,531,668) / HPV18 L2 (4453)

Chr7p21.1: AACACAACACATTACAATGGACTTTAATTATGTCCAAATGTGATTTCTTTGCT  
HPV18 L2: TGGCAGTGGTACAGGGGGTGTGACAGGGTACATTCATTGGGTGGGCGTCCAA  
Jx Chr7/HPV18: AACACAACACATTACAATGGACTTTCCATTTGTACATTCATTGGGTGGGCGT

Junction 2: Chr7p21.1 (17,352,218) / HPV18 E1 (1180)

HPV18 E1: GTGTTGCATGTTTTAAACGAAAGTTTGCAGGAGGCAGCACAGAAAACAGTC  
Chr7p21.1: GCTTCAAGTAAAGGAGATCTCACAGTCTATCTTATAAAGTTTTATCTTATAAAG  
Jx HPV18/Chr7: GTGTTGCATGTTTTAAACGAAAGTTTATCTTATAAAGTTTTATCTTATAAAG

# Fig S2 (continued)

## Case 23 (MJ-CL):

Junction 1: Chr2q22.3 (146,417,585) / HPV16 E1 (1081)

HPV16 E1: **GAGACAGC**CACATGCGTTGTTT**ACTGCAC**AGGAAG**CAAAA**CAACATAGAGATGC  
Chr2q22.3: **AGCATATACTG**TAAAAAAAAG**AGTCT****AAAATAGATCAAAATTGTGGTTAACAAA**  
Jx HPV16/ Chr2: **GAGACAGC**CACATGCGTTGTTT**ACTGTCATGTTA****AAAATAGATCAAAATTGTGGTT**

Junction 2: Chr2q22.3 (146,422,052) / HPV16 E1 (1181)

Chr2q22.3: **AATCAAATTTTTTTT**AAAAGA**AGATCAATA**ACTTTT**TGAAGACG**AA**AGTATTGA**  
HPV16 E1: **GTGATATTAGTGGAT**GTGTAG**ACAATAA**TTAG**TCTAGATTA**AA**AGCTATA**  
Jx Chr2/HPV16: **AATCAAATTTTTTTT**AAAAGA**AGATCAATA**TTAG**TCTAGATTA**AA**AGCTATA**

## Case 28 (MJ-CL):

Junction 1: Chr5q12.3 (66,508,046) / HPV16 E6 (331)

HPV16 E6: **AAAGTTTTATTCTAA**AA**TTAGTGAGTAT**AG**ACATTAT**TGTTATAGT**TTGTATG**  
Chr5q12.3: **CCAATGCTCCAGCTC**ATGC**AGTCACGT****AGAGAAATTCCCTCTTACTTGGCCT**  
Jx HPV16/ Chr5: **AAAGTTTTATTCTAA**AA**TTAGTGAGTAT**AG**AGAAATTCCCTCTTACTTGGCCT**

Junction 2: Chr5q12.3 (66,547,382) / HPV16 E1 (1516)

HPV16 E6: **AAITTTAAAGAGTT**TATACGG**GGTGAGTTTT**TCAGAA**TTAGTAAGAC**ATT**TTAAAG**  
Chr5q12.3: **TTCTTCTACCCAT**GAGCAT**GGAATGTTCTTCC**ATT**TGTTGATTCTCTTTTATT**  
Jx HPV16/ Chr5: **AAITTTAAAGAGTT**TATACGG**GGTGAGTTCTTCC**ATT**TGTTGATTCTCTTTTATT**

\*SNP in HPV16 position 1520 (T>C)

## Case 30 (MJ-SC):

Junction 1: ChrXq12 (67,757,299) / HPV31 E2 (2848)

HPV31 E2: **AAGAGAAATGGGA**ATACACAG**TATTA**ACC**ACCAGGTGGT**GCCAGCG**TTGT**CGAT  
ChrXq12: **CTGTATACCAT**GCCAG**GCAC**TTT**ATTAGTGC**TTT**ACAAACAGTATCTCTG**ATTG  
Jx HPV31/ ChrX: **AAGAGAAATGGGA**ATACACAG**TATTA**GTATTG**TGTTGCTTTACAAACAGTATCTCT**

Junction 2: Chr20q13.32 (56,885,148) / HPV16 E4 (3355)

HPV31 E4: **ATTGTTACA**AA**AGCTACCA**ACAG**CCCAACAAC**ACC**ACCACATCGA**ATT**CCAAAA**  
Chr20q13.32: **CGGATCC**CC**CCCTG**CC**CTCAT**CC**CTTCC**CC**CTCC**AC**GTCC**AA**AGCGCTG**  
Jx HPV31/ Chr20: **ATTGTTACA**AA**AGCTACCA**ACAG**CCCTTCC**CC**CTCC**AC**GTCC**AA**AGCGCTG**

## Case 34 (MJ-SC):

Junction 1: Chr8q23.1 (107,273,933) / HPV16 E1 (1166)

HPV16 E1: **GTCCACTTAGT**GAT**ATTAGTGGATG**TG**TAGACA**ATAAT**TATTAGT**CTC**TAGAT**AAA  
Chr8q23.1: **TTCTAAGCCTTGGT**CACTG**GCTGCCTG****GAAATACACTTGGT**GCT**GTTGCGGCAG**  
Jx HPV16/ Chr8: **GTCCACTTAGT**GAT**ATTAGTGGATG**TG**GAAATACACTTGGT**GCT**GTTGCGGCAG**

Junction 2: Chr2q36.3 (228,020,331) / HPV16 L1 (6286)

Chr2q36.3: **CGCTGGAGTT**CAG**CCCAAGGCA**ATT**CCAGGAGTCTGAA**AG**GTCCAGAGAATT**  
HPV16 L1: **TGGACTTTACT**ACATT**CAGGCTA**AC**AAAAAGTGAAGTCC**ACT**GATATTTGTAC**  
Jx Chr2/HPV16: **CGCTGGAGTT**CAG**CCCAAGGCA**AAAA**AGTGAAGTCC**ACT**GATATTTGTAC**

## Case 24 (MJ-CL):

Junction 1: Chr3q27.3 (187,613,922) / HPV31 E2 (2805)

HPV31 E2: **ATTGGAAC**AT**TTCGACTTGA**AT**GTGTATT**AATGT**ATAAAGCA**AG**AGAAATG**  
Chr3q27.3: **TAATGCTA**GAT**GACGAGTTAGTGGTGT**A**ATGCACCAGCATGGC**ACAT**GTATA**  
Jx HPV31/ Chr3: **ATTGGAAC**AT**TTCGACTTGA**AT**TGTAATGCACCAGCATGGC**ACAT**GTATA**

\* SNP in HPV31 position 2805 (G>A)

Junction 2: Chr3q27.3 (187,600,502) / HPV31 E2 (3664)

Chr3q27.3: **ATCAAGATCTAGA**ACAG**TGCA**ATT**ACC**CAAA**ATATGCTT**CTT**ACCCTCTGTG**  
HPV31 E2: **ATTGTATGA**AC**AGTGTCA**TCT**ACATGGC**ATT**GGACATG**TACAGAT**GGA**AA**ACAT**  
Jx Chr3/HPV31: **ATCAAGATCTAGA**ACAG**TGCA**ATT**ACC**ATT**GGACATG**TACAGAT**GGA**AA**ACAT**

## Case 29 (MJ-CL):

Junction 1: Chr8q24.21 (128,676,026) / HPV16 E1 (1473)

Chr8q24.21: **GAAAAA**AA**CCCATCAAA**T**CCCTCTGC**CTT**GTGGT**CTC**ACAGG**AG**GCAAACT**  
HPV16 E1: **TTTTAA**TG**TACTAAA**ACT**AGTAATG**CA**AAAGGCAG**CA**ATGTTAGCAAA**AT**TTA**  
Jx Chr8/ HPV16: **GAAAAA**AA**CCCATCAAA**T**CCCTCTGC**AA**AGGCAG**CA**ATGTTAGCAAA**AT**TTA**

Junction 2: Chr8q24.21 (128,760,118) / HPV16 E1 (955)

HPV16 E1: **GTAGTGG**AAAA**AAACAGGG**AT**GCTAT**ATCAGAT**GACGAGAA**CG**AAATGA**  
Chr8q24.21: **GCAGAG**CC**TGTAATCCCA**G**CTACT**CG**GGAGCTGAGGC**AG**AGAA**TT**ACTTGA**  
Jx HPV16/ Chr8: **GTAGTGG**AAAA**AAACAGGG**CAGAGAA**TTCTCTGAGGCAGAGAA**TT**ACTTGA**

## Case 33 (MJ-SC):

Junction 1: Chr1q42.3 (236,318,610) / HPV16 LCR (7164)

Chr1q42.3: **AAGTAGAAG**CAG**CTTAATGAAT**TT**TGCTTA**AT**GTCTT**CA**CTCGCAGAT**AG**AC**  
HPV16 LCR: **CGCAAAAAC**GTAA**AGCTGTAA**GT**ATTG**TAT**GTATGTTGA**ATT**AGTGTGTTGTT**  
Jx Chr1/HPV16: **AAGTAGAAG**CAG**CTTAATGAAT**TT**TGTTATGTTGA**ATT**AGTGTGTTGTT**

Junction 2: Chr20q11.21 (30,208,967) / HPV16 E4 (3411)

Chr20q11.21: **GGTAGAATGCTTT**CA**AGTTGGATT**T**GCTGAGATTTC**T**TGTATCAAA**TT  
HPV16 E4: **TATTAGGCAG**CA**CTTGGCCA**ACC**ACC**CC**CGCCGCGACCC**AT**ACCA**AA**AGCCGTC**  
Jx Chr20/HPV16: **GGTAGAATGCTTT**CA**AGTTGGATT**CC**GCCGCGACCC**AT**ACCA**AA**AGCCGTC**
