# Supplementary material for: Mechanistic signatures of HPV insertions in cervical carcinomas
Source: PubMed Central journal article supplement (PMC5685317; doi:10.1038/npjgenmed.2016.4), 2016-03-16

Case 5 (2J-COL)

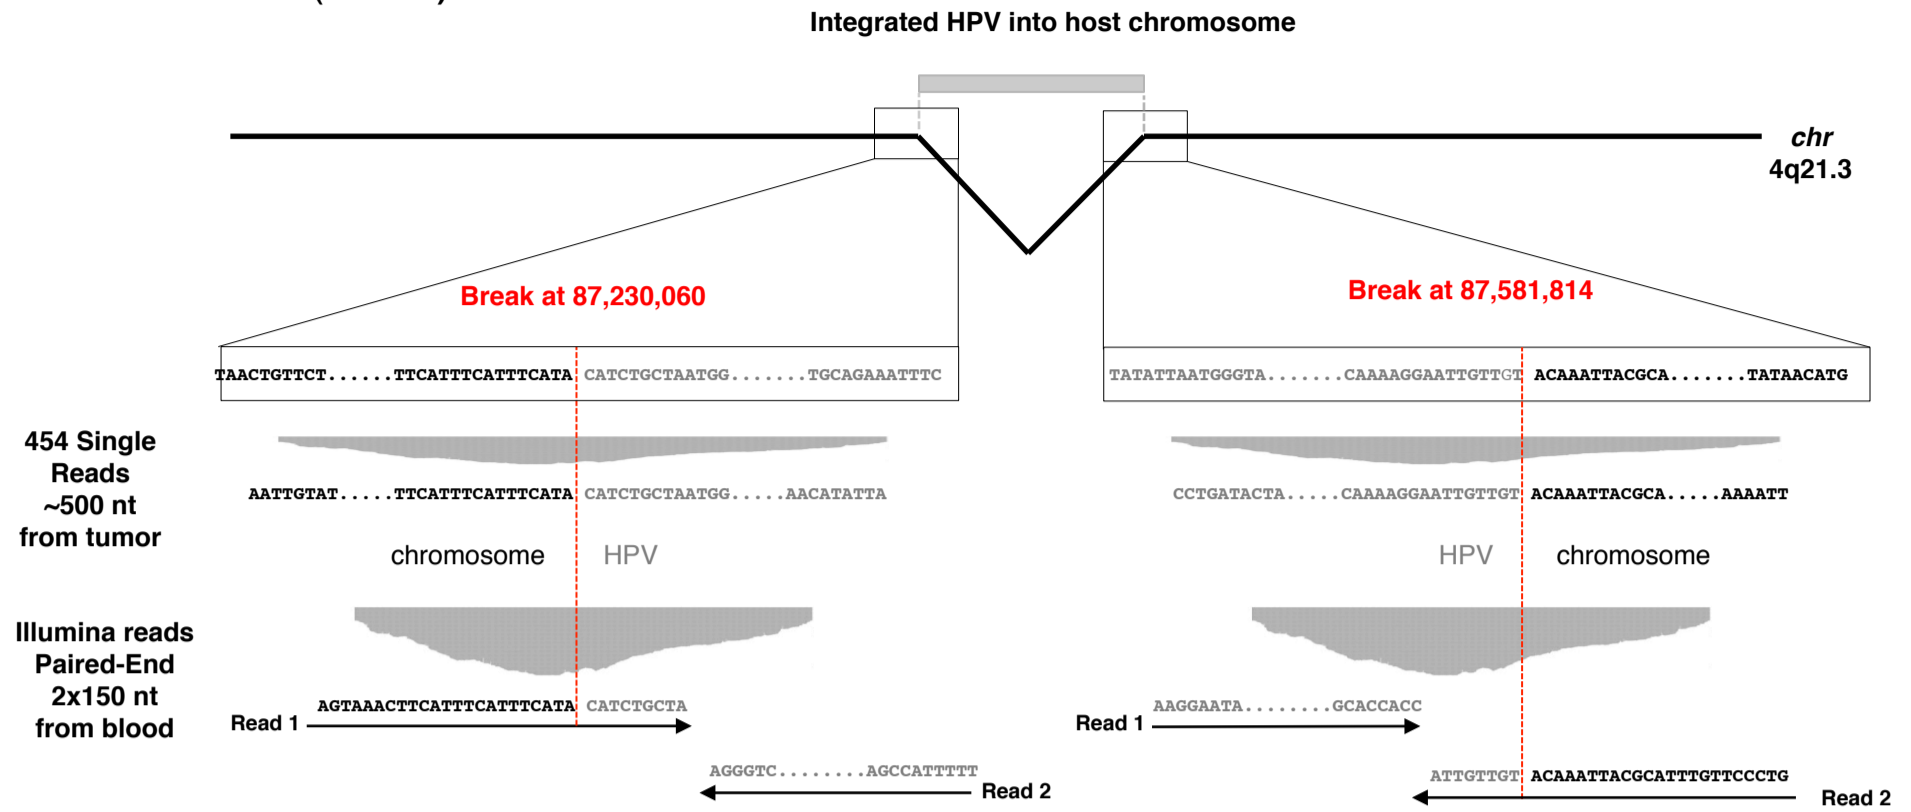

Case 7 (2J-COL)

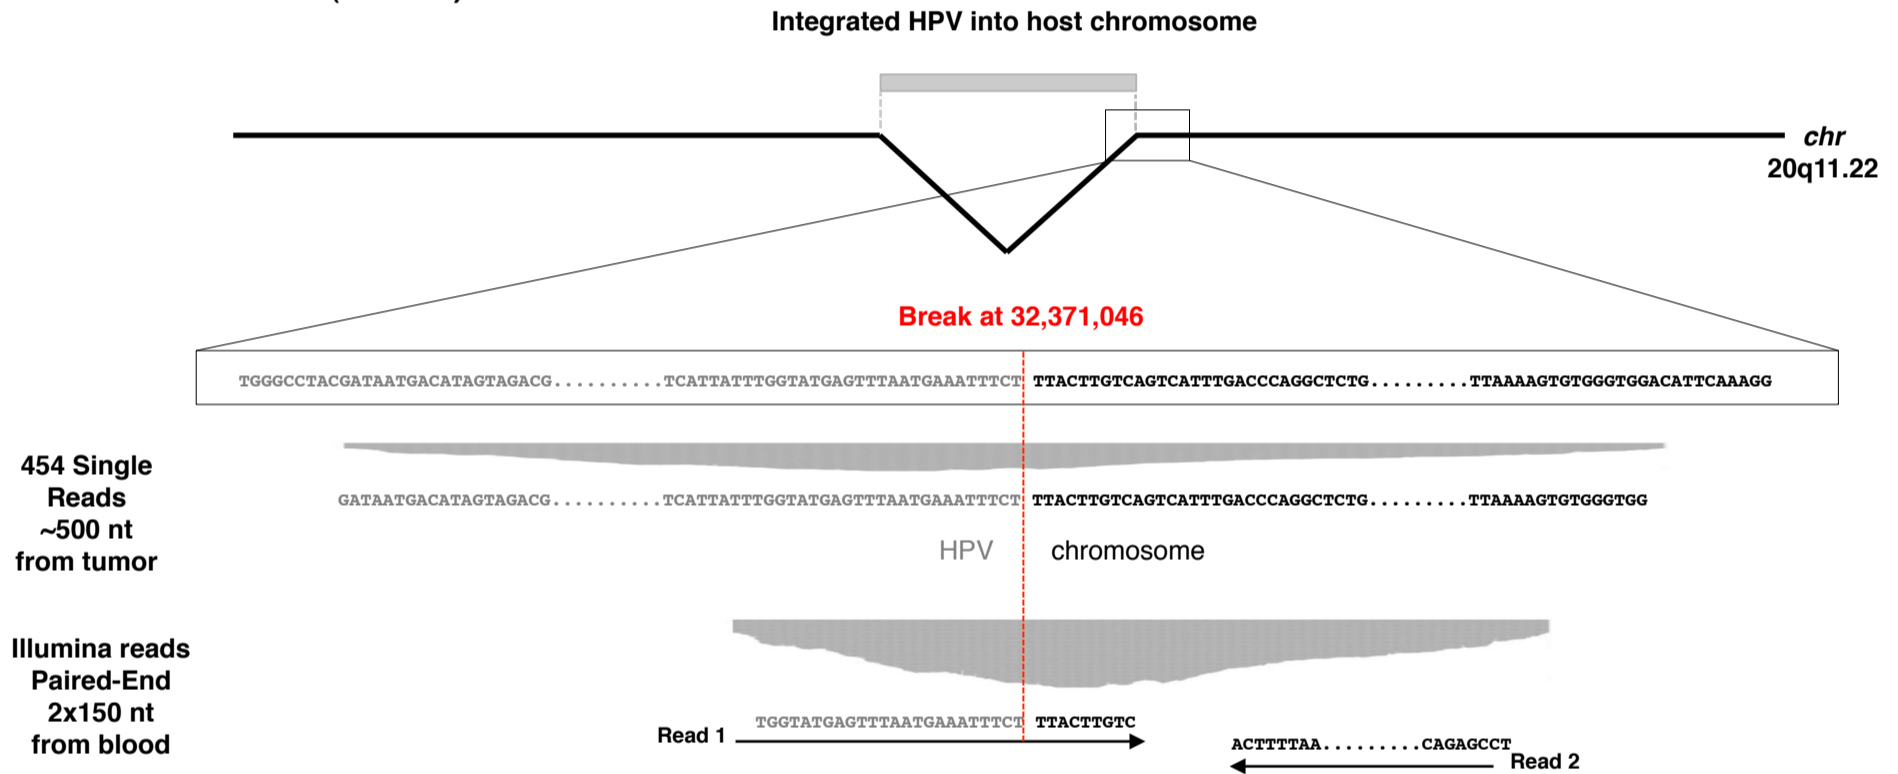

Case 18 (2J-NL)

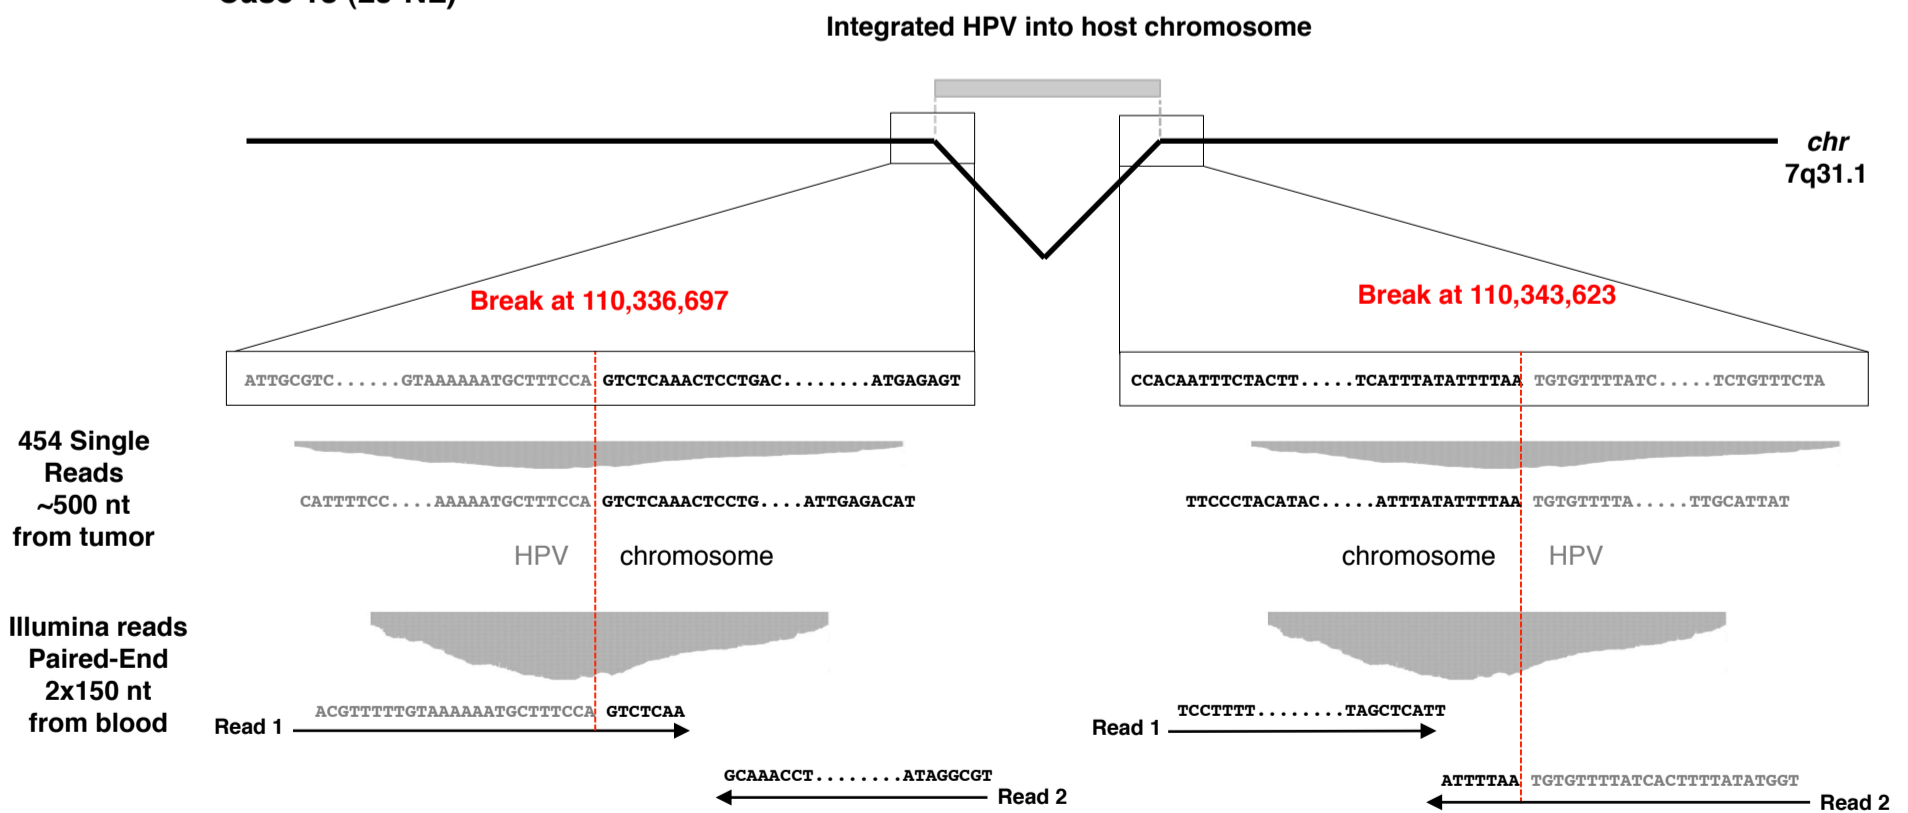

Case 20 (2J-NL)

Integrated HPV into host chromosome

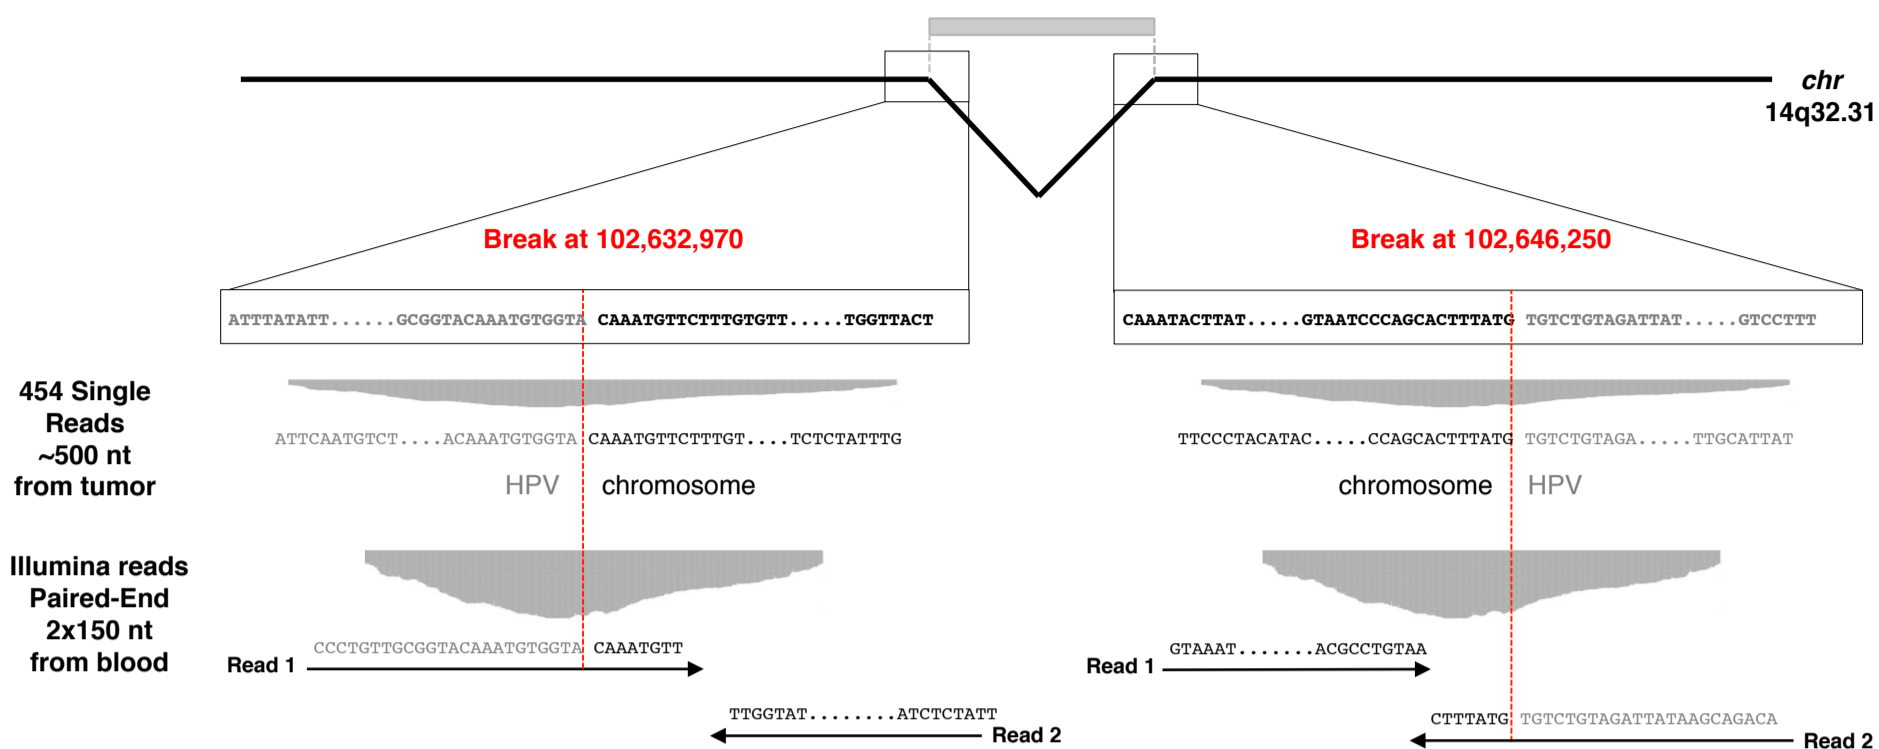

Case 29 (MJ-CL)

Integrated HPV into host chromosome

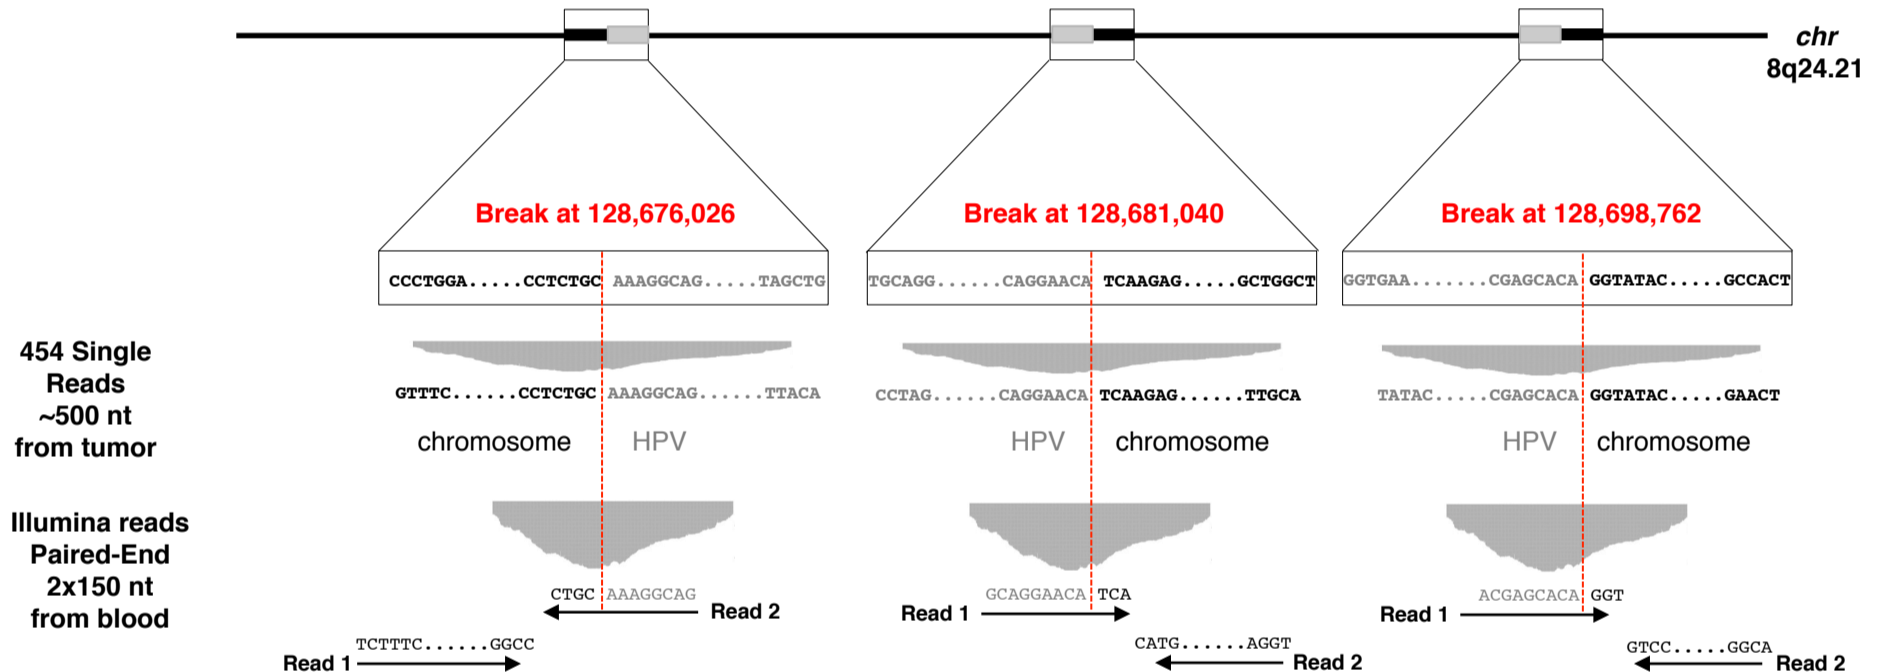

Supplement: npjgenmed20164-s5.pdf [file npjgenmed20164-s5.pdf]
