# Supplementary material for: Mechanistic signatures of HPV insertions in cervical carcinomas
Source: PubMed Central journal article supplement (PMC5685317; doi:10.1038/npjgenmed.2016.4), 2016-03-16

Fig S4

A

Positive correlation between the qPCR and 454 NGS viral load

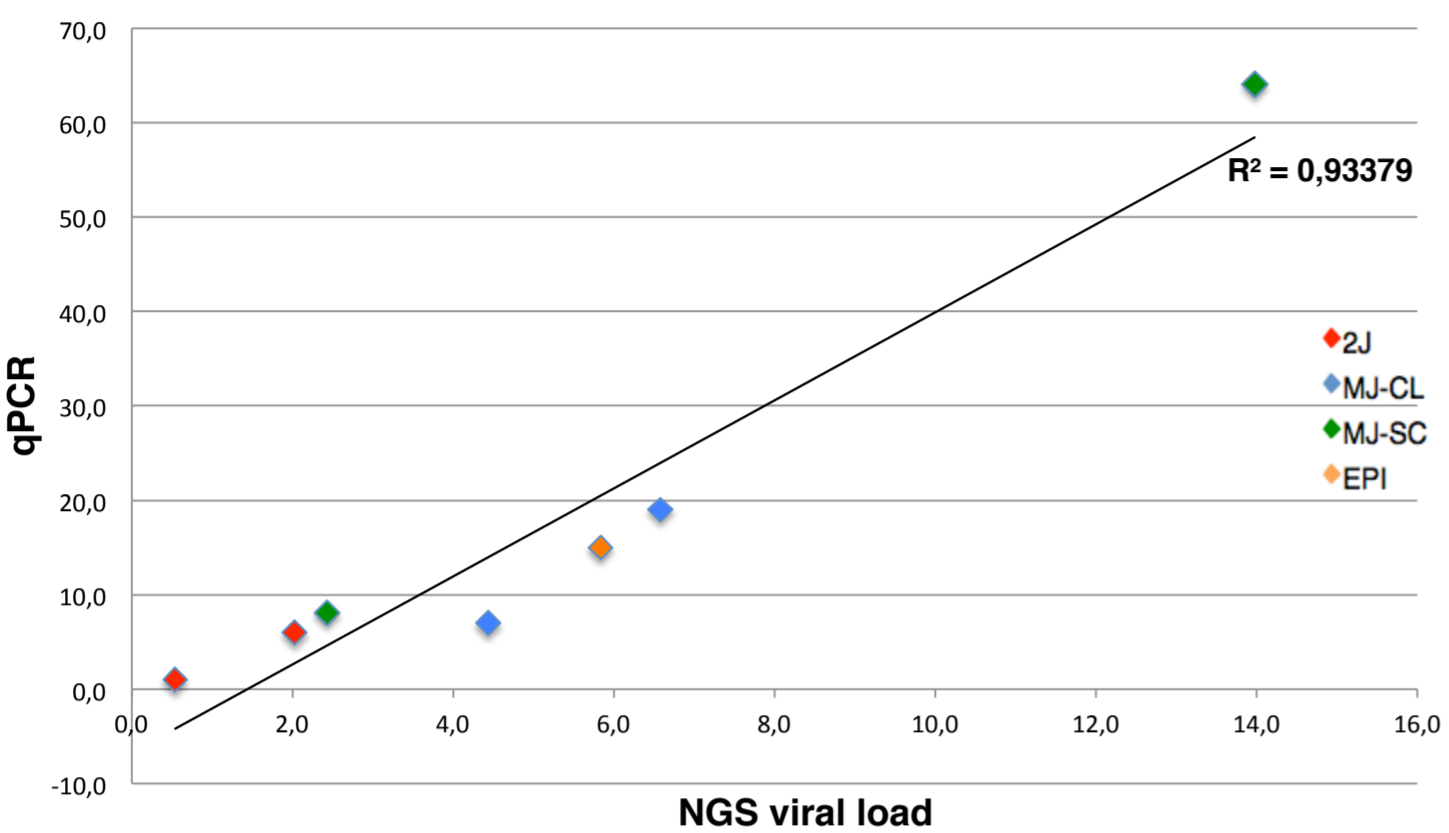

Positive correlation between the qPCR and Illumina MiSeq NGS viral load

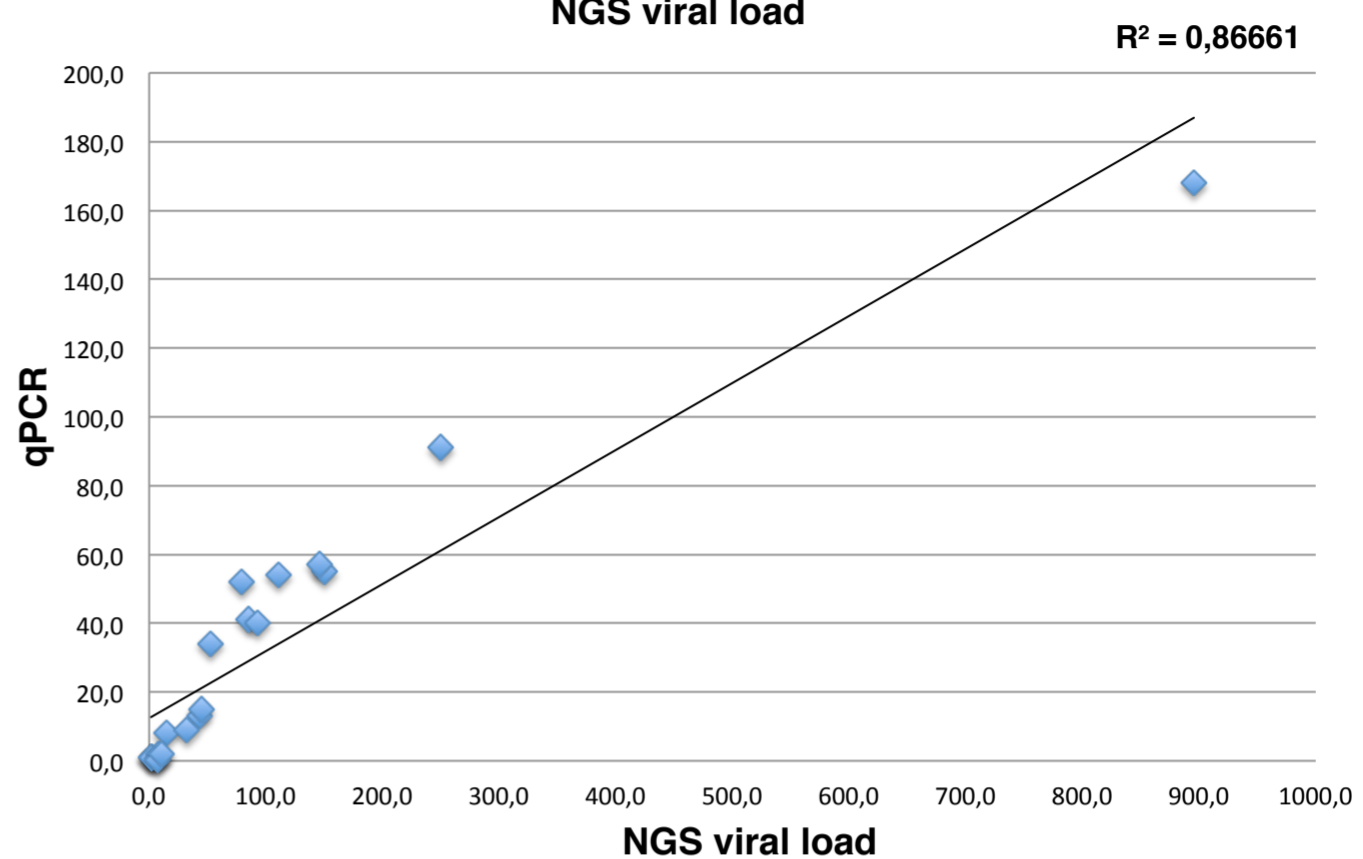

B

Positive correlation between the qPCR viral load and number of HPV NGS reads

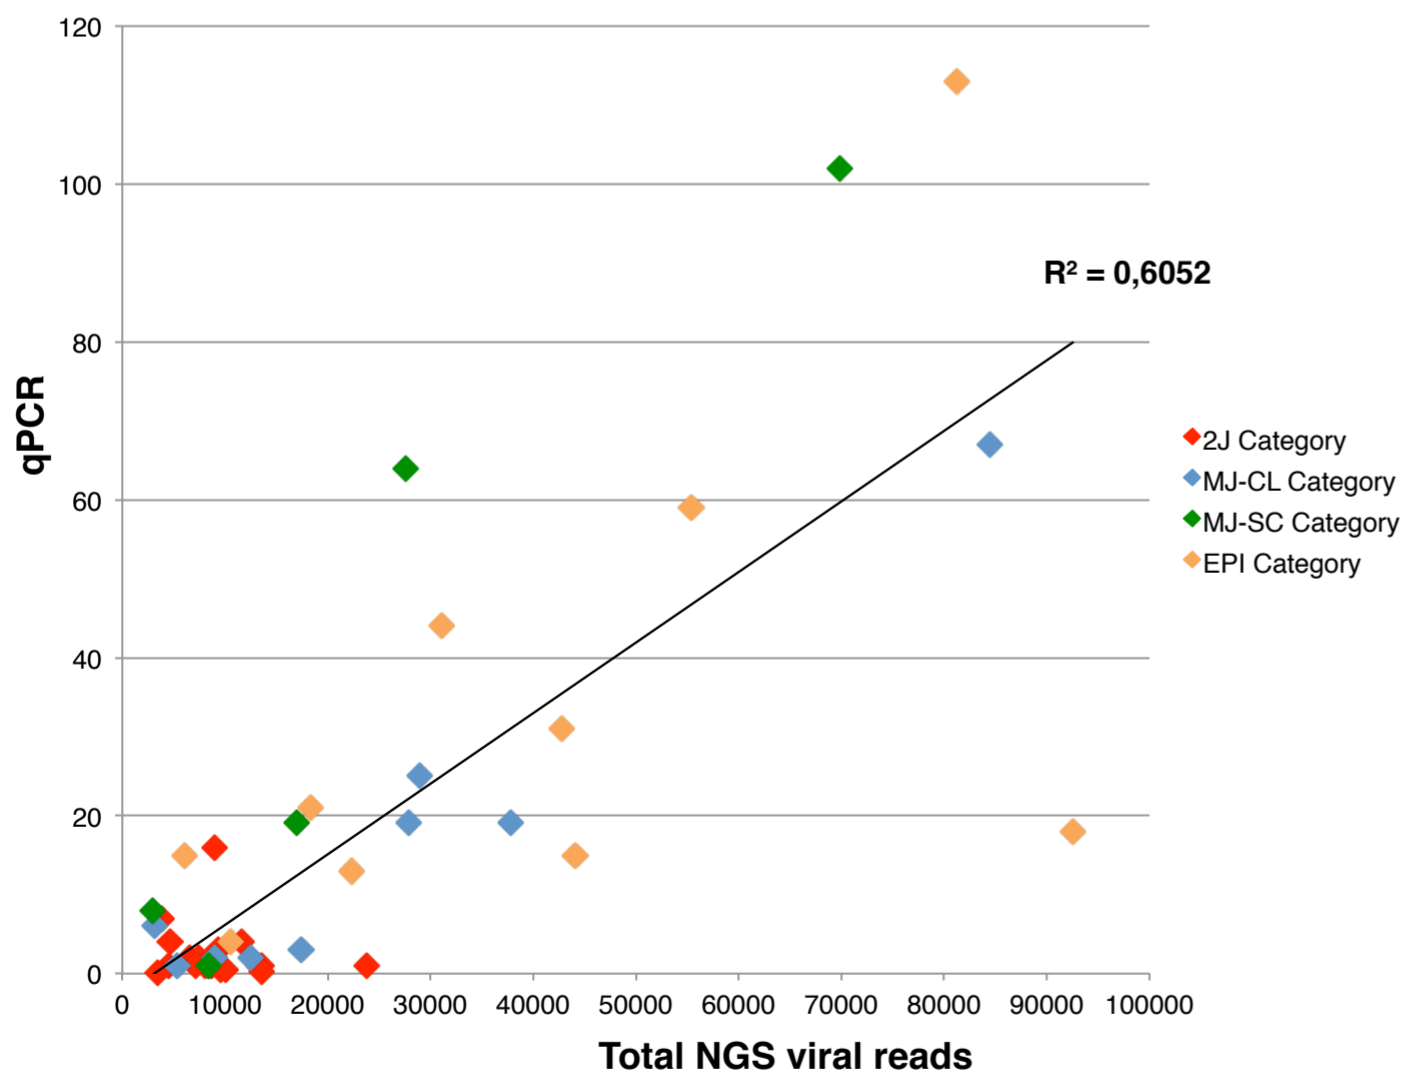

Supplement: npjgenmed20164-s6.pdf [file npjgenmed20164-s6.pdf]
