# Supplementary material for: Mechanistic signatures of HPV insertions in cervical carcinomas
Source: PubMed Central journal article supplement (PMC5685317; doi:10.1038/npjgenmed.2016.4), 2016-03-16

Fig S7

2J-COL

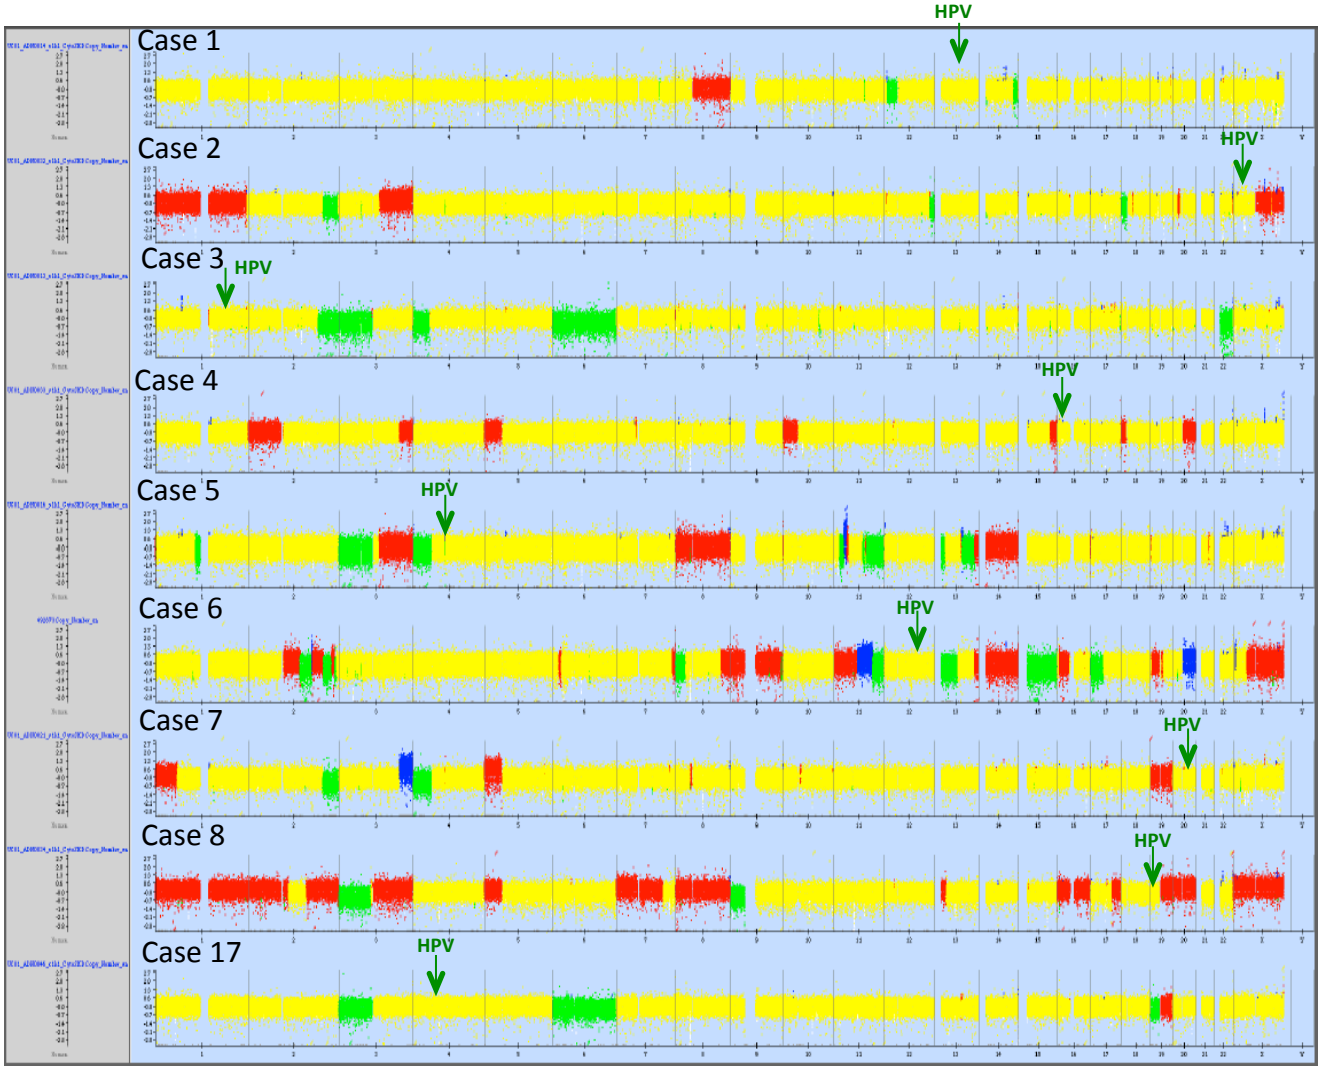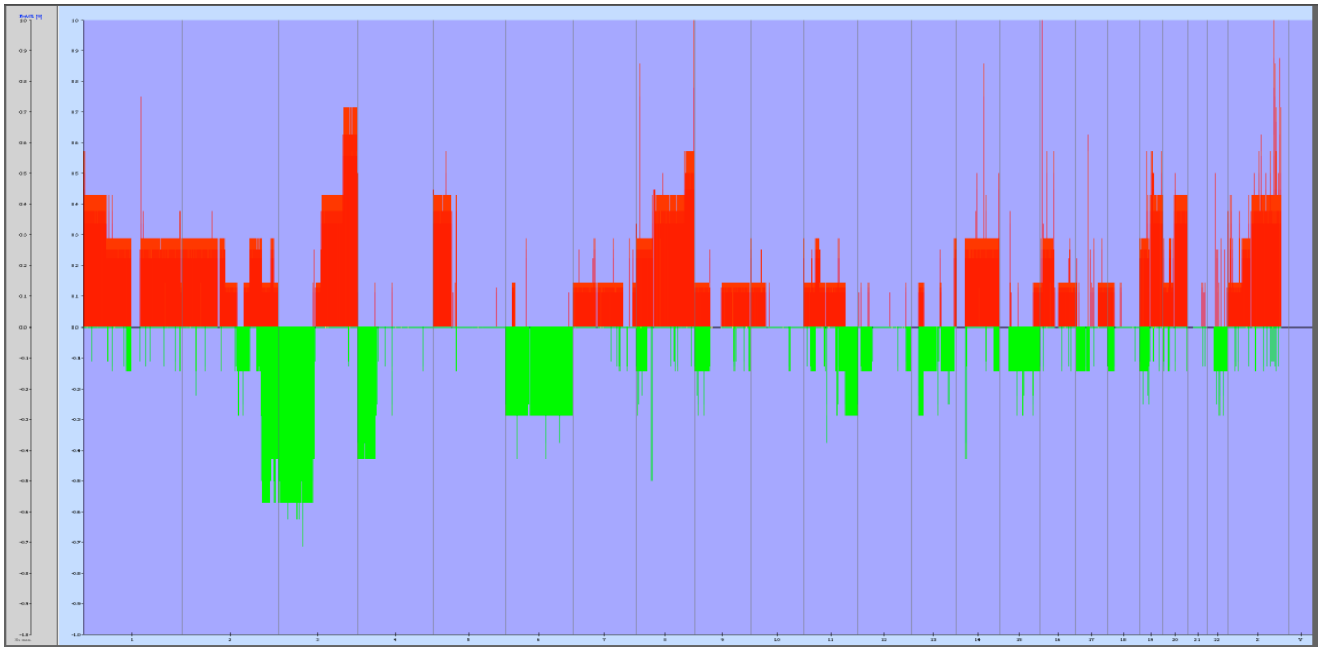

Fig S7

2J-NL

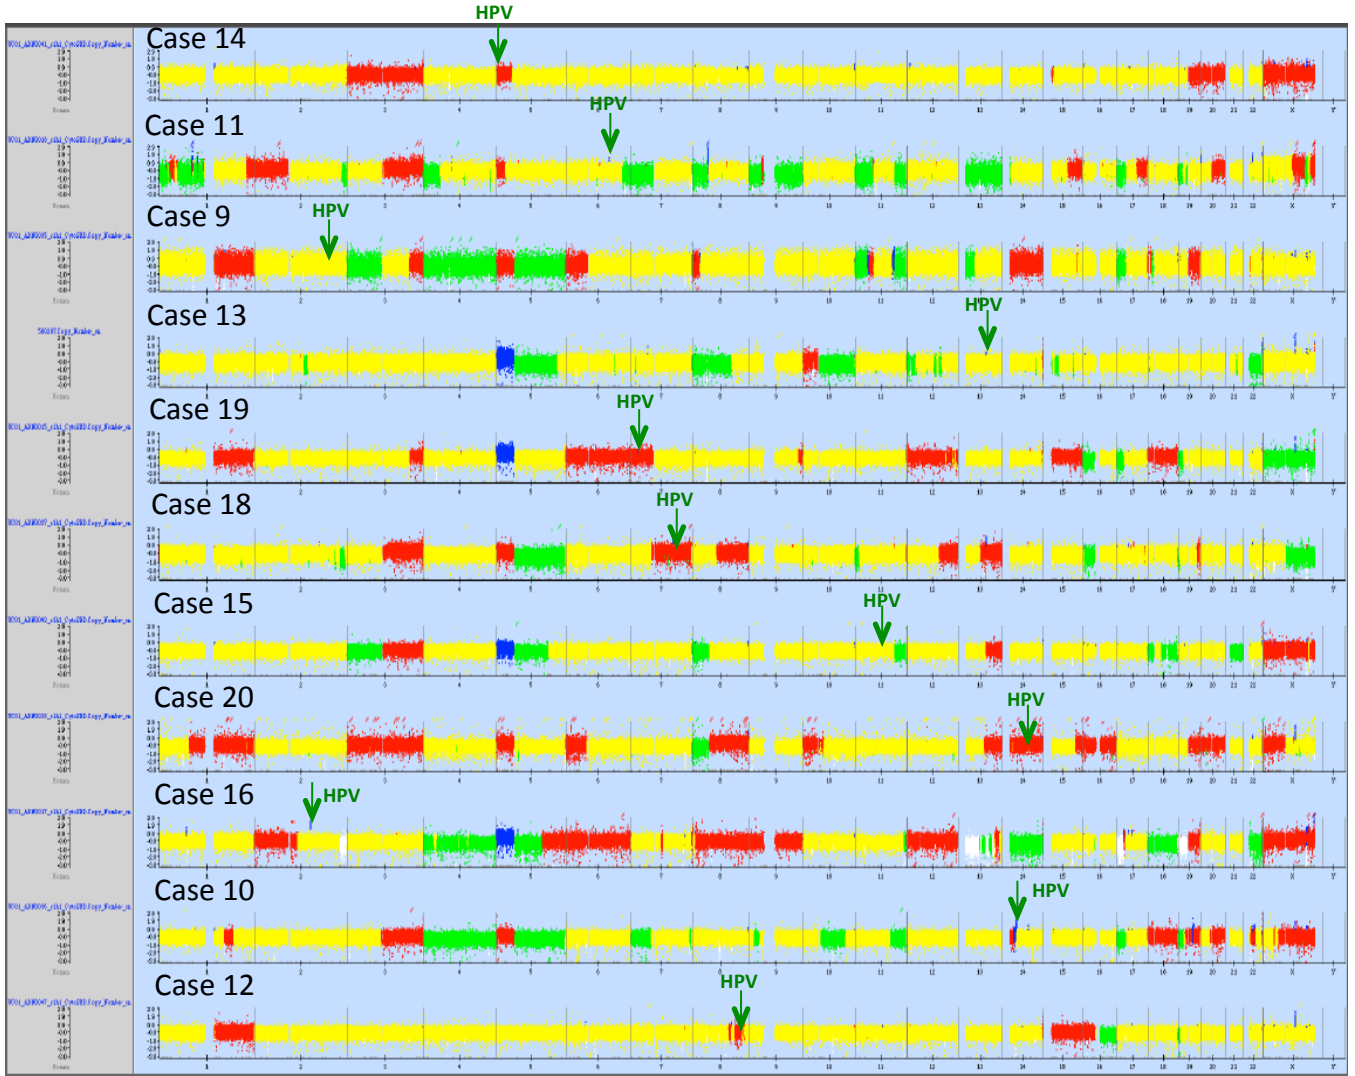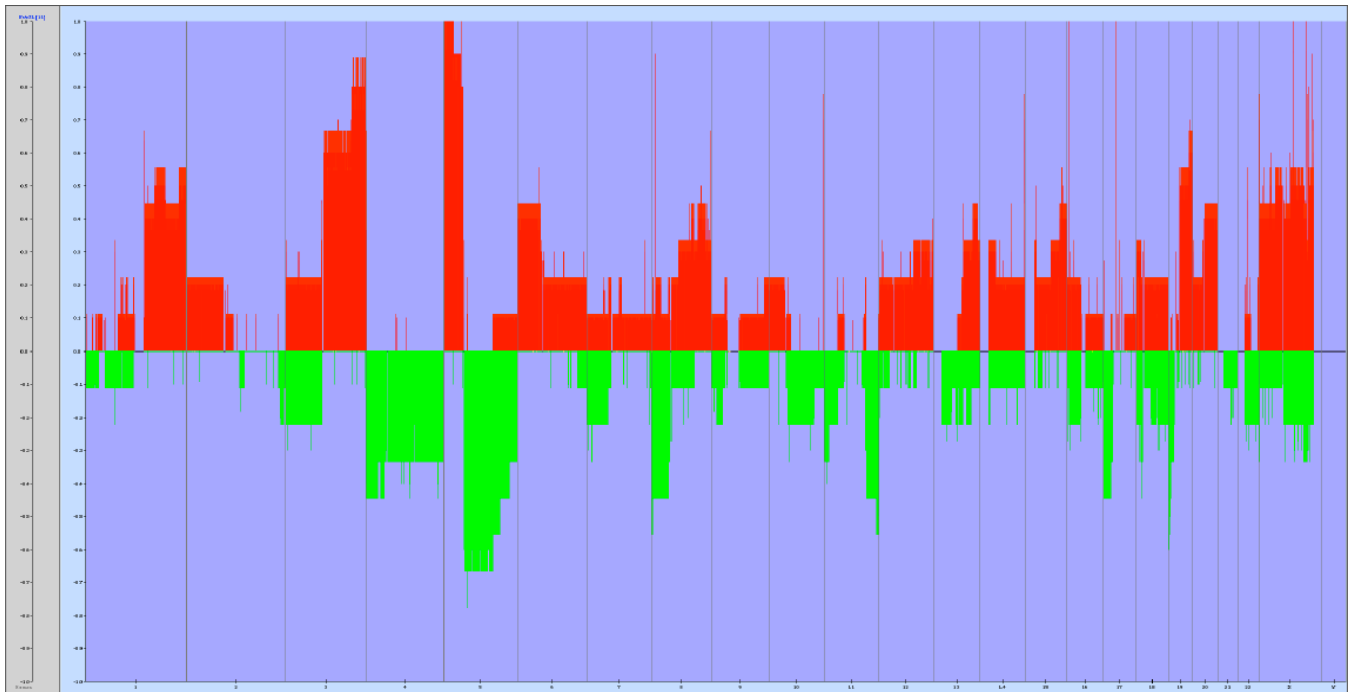

Fig S7

MJ-CL

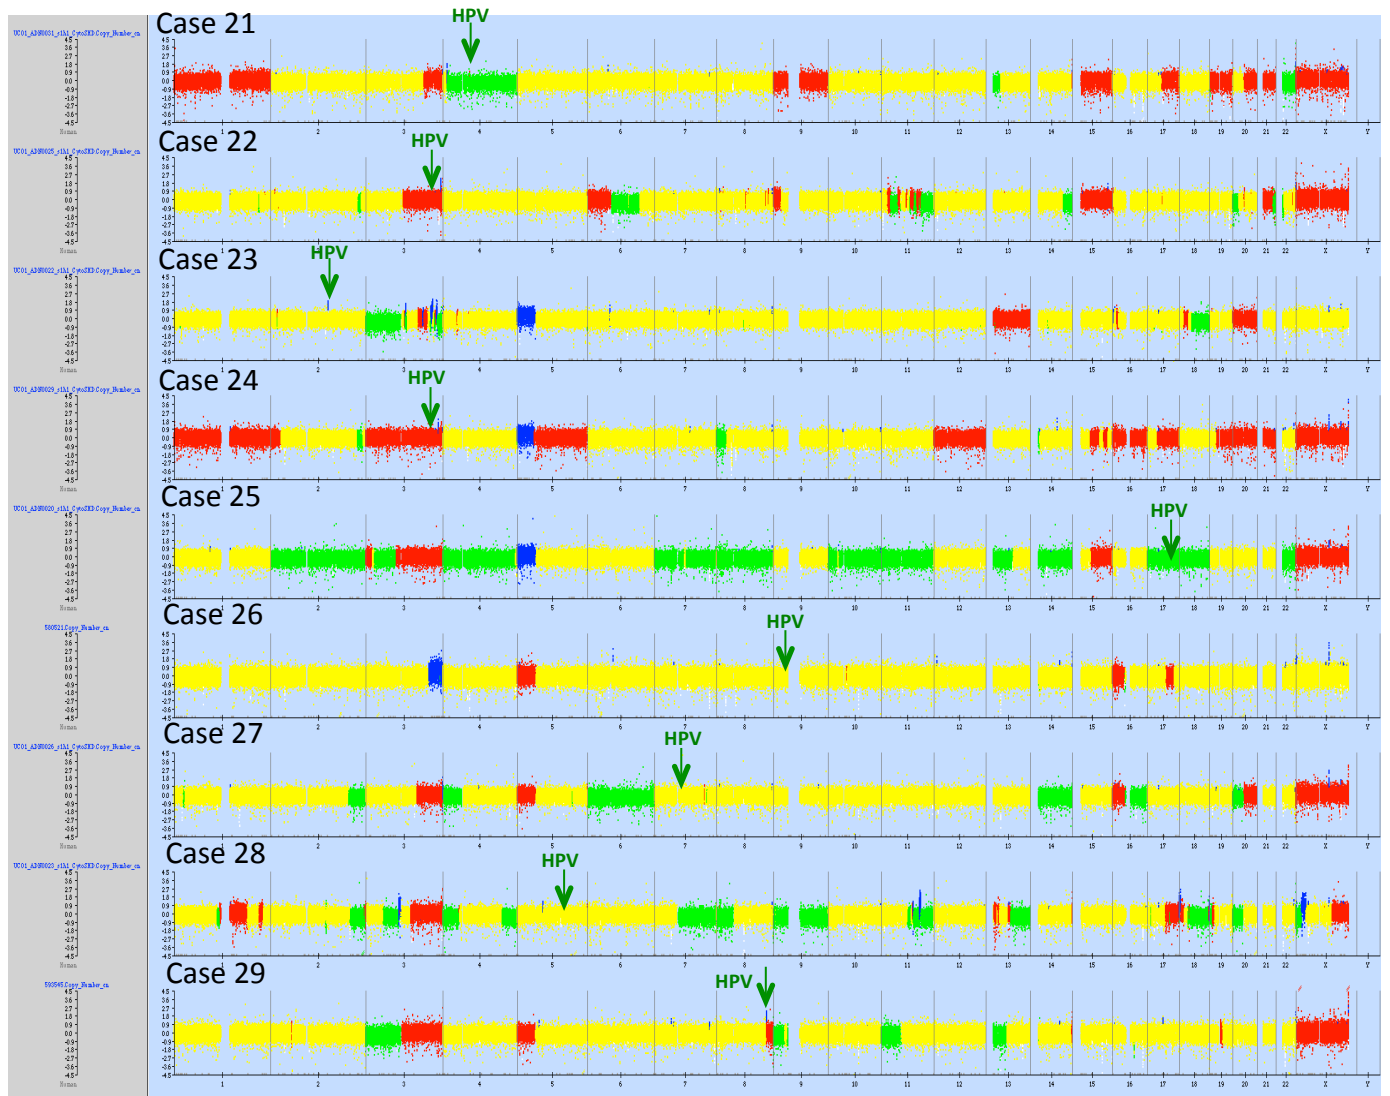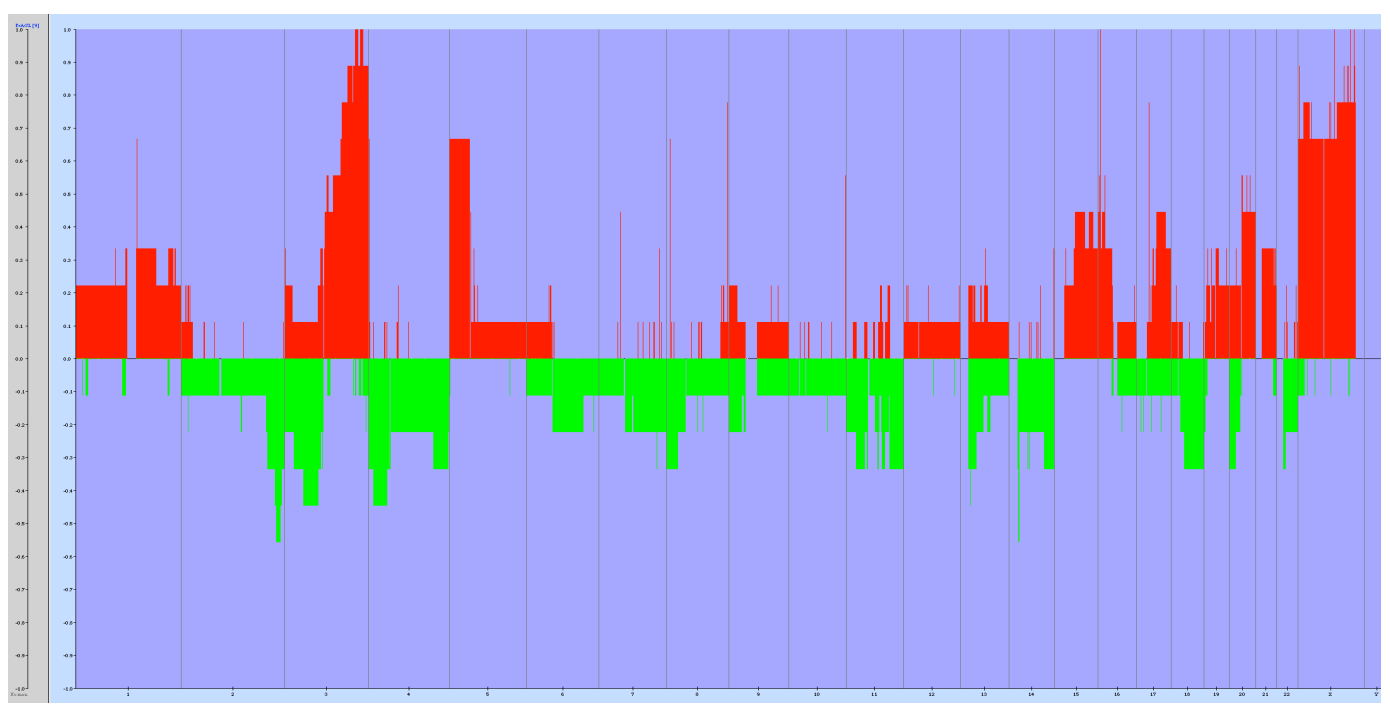

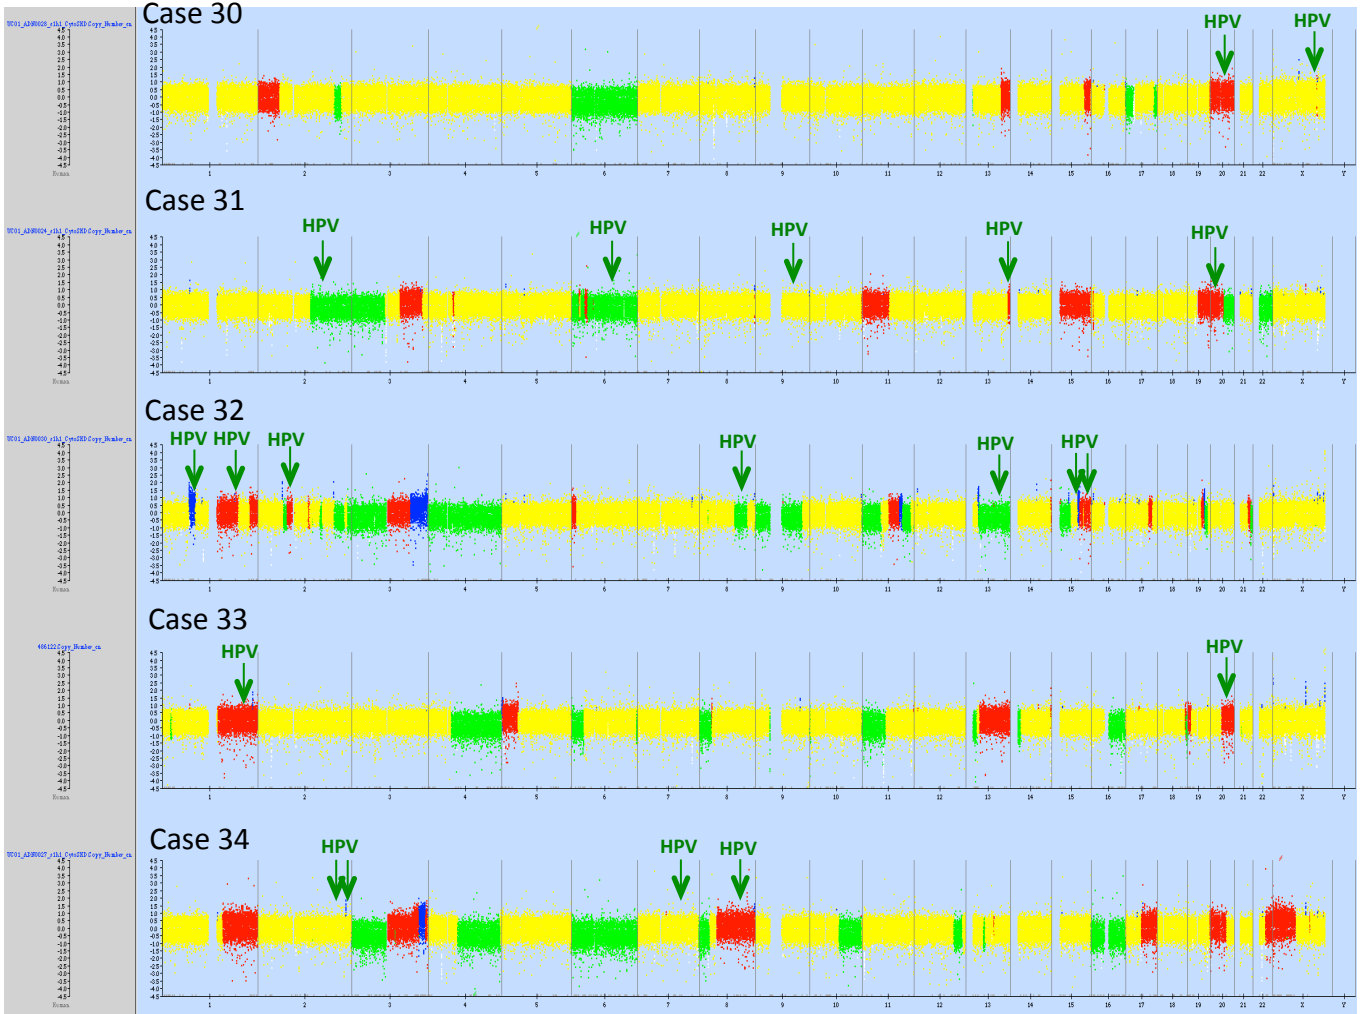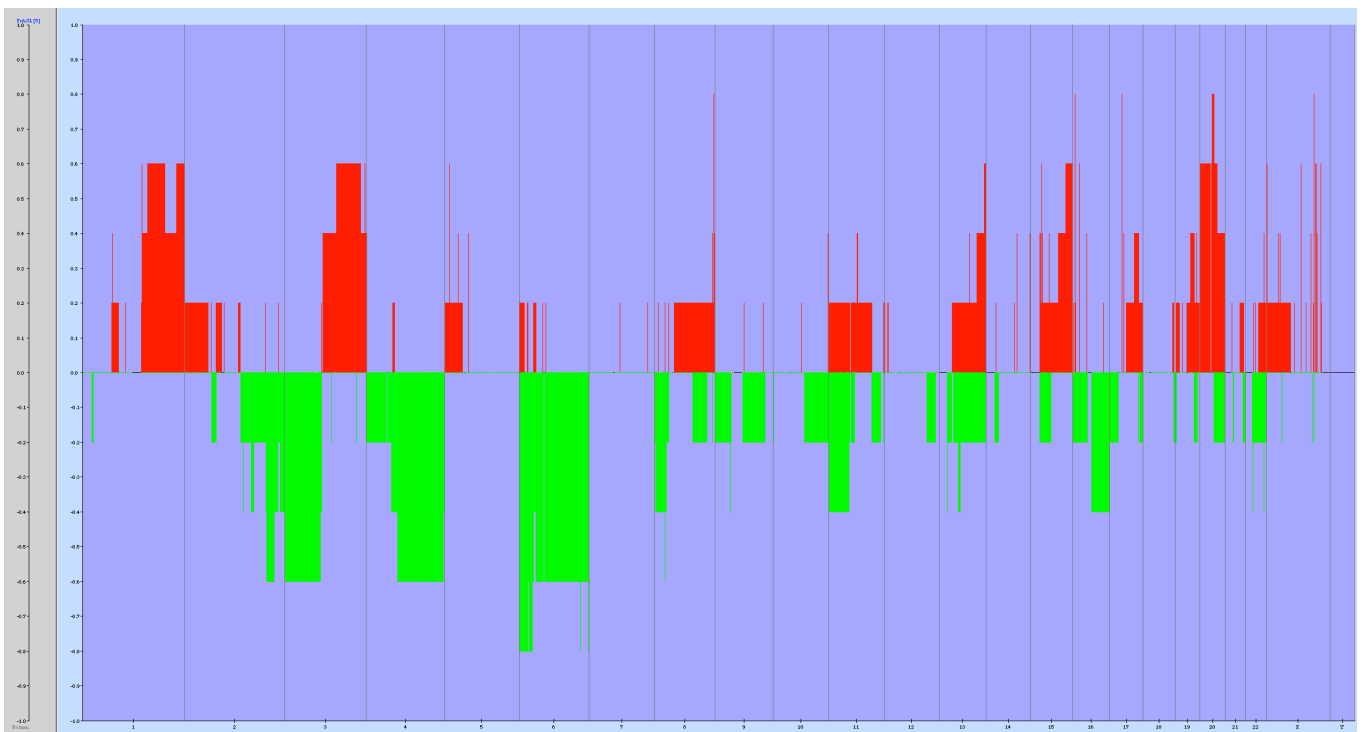

Fig S7

# EPI (no viral integration sites)

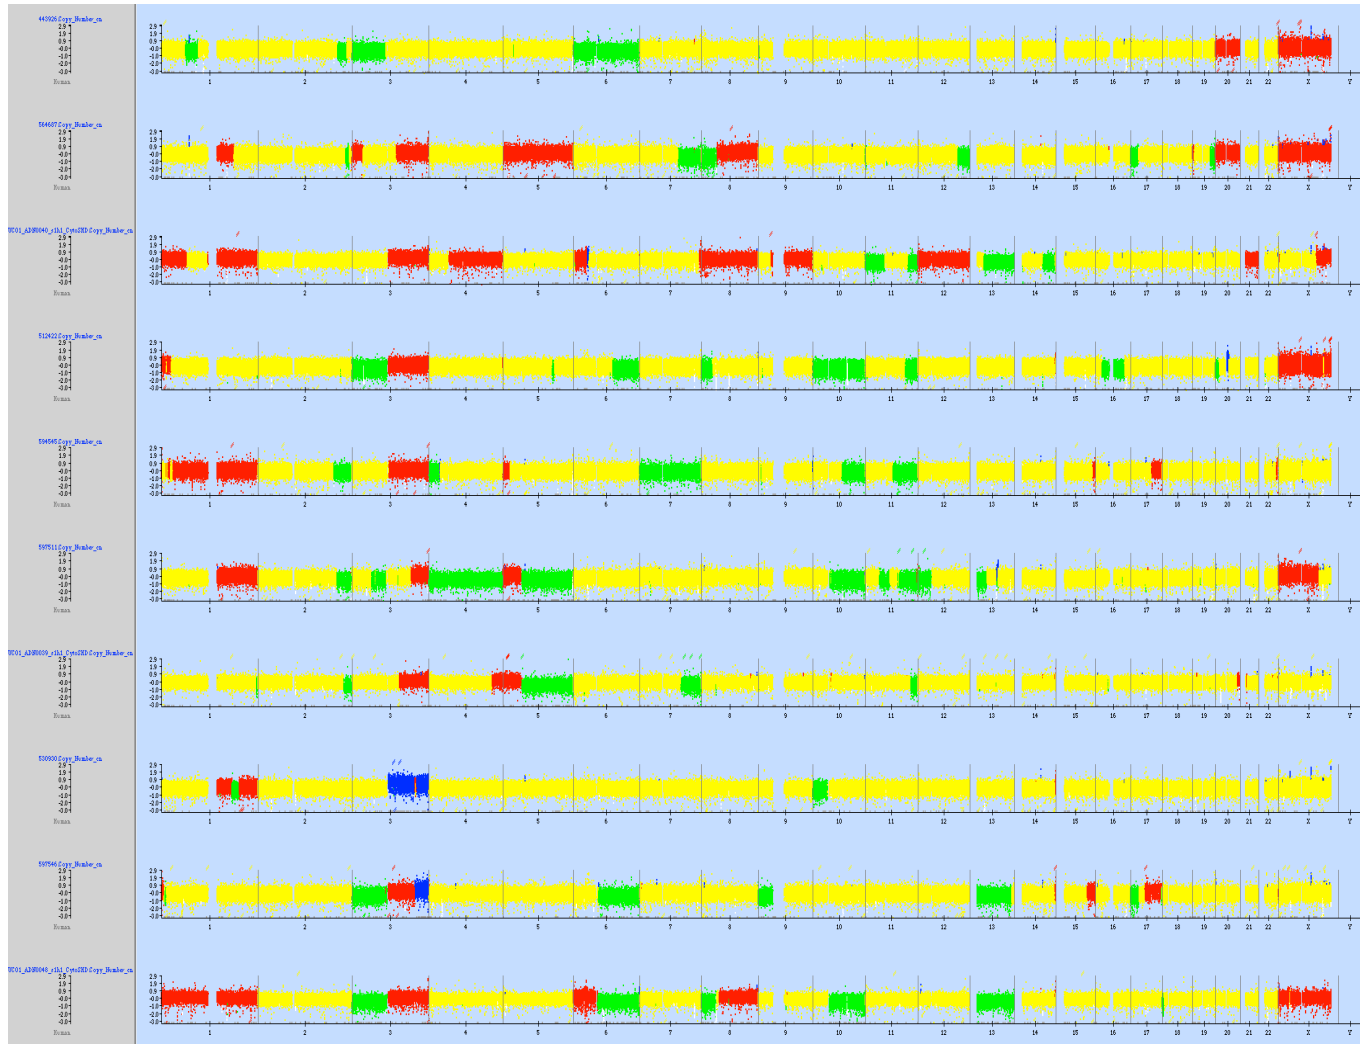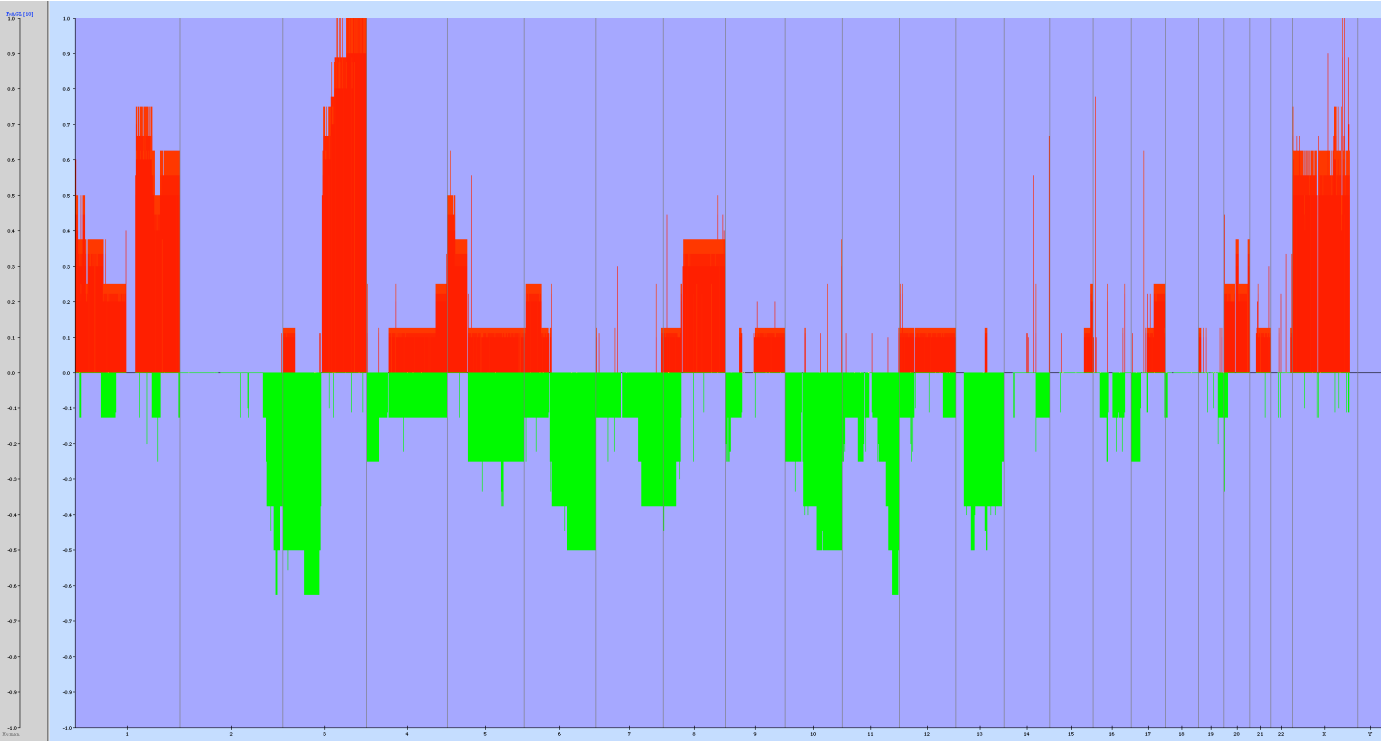

Supplement: npjgenmed20164-s9.pdf [file npjgenmed20164-s9.pdf]
