# Supplementary material for: Mechanistic signatures of HPV insertions in cervical carcinomas
Source: PubMed Central journal article supplement (PMC5685317; doi:10.1038/npjgenmed.2016.4), 2016-03-16

Fig S10

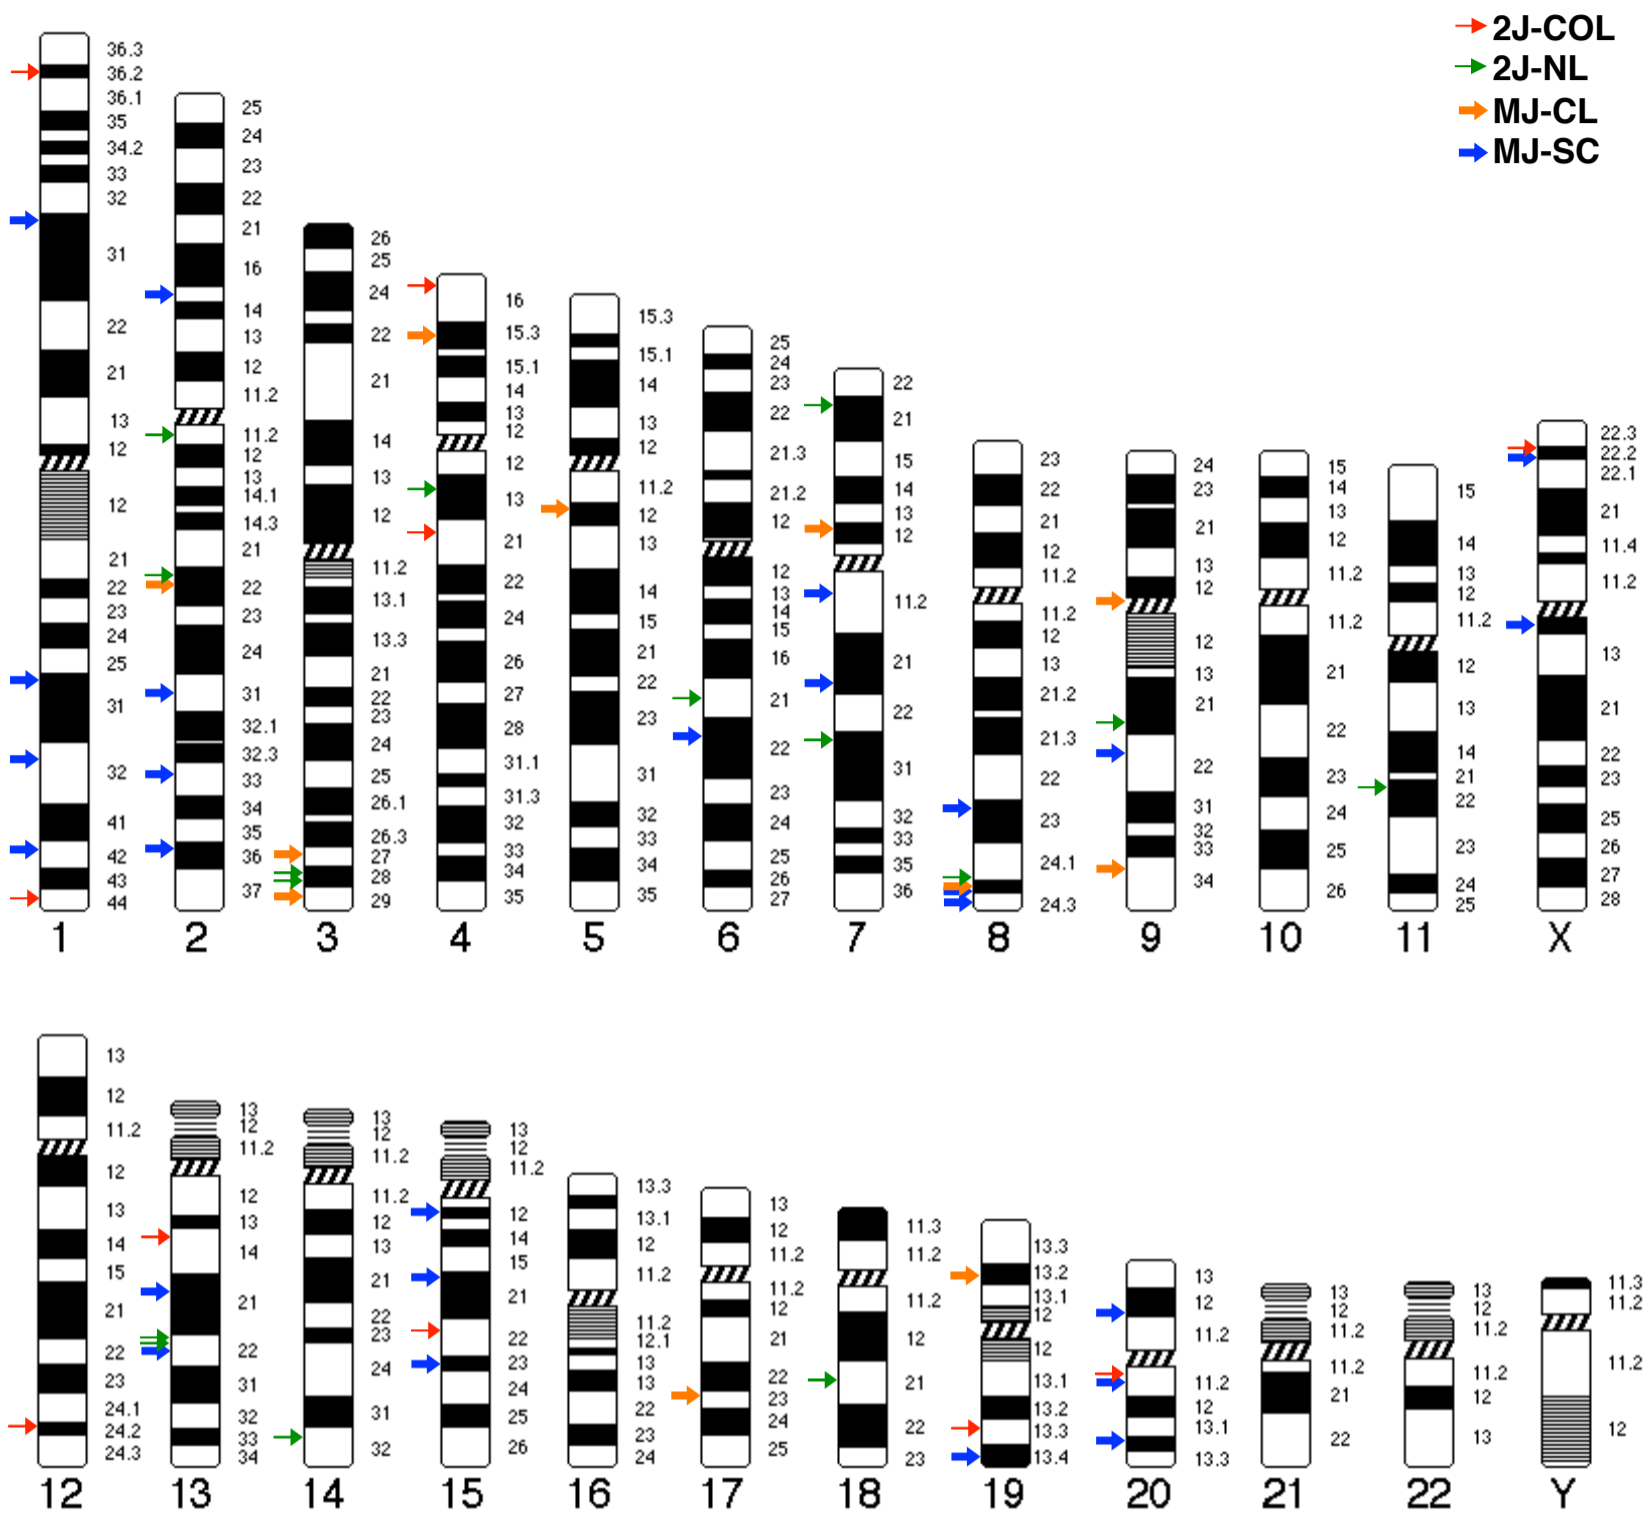

Supplement: npjgenmed20164-s12.pdf [file npjgenmed20164-s12.pdf]
