# Supplementary material for: Mechanistic signatures of HPV insertions in cervical carcinomas
Source: PubMed Central journal article supplement (PMC5685317; doi:10.1038/npjgenmed.2016.4), 2016-03-16
Supplement: npjgenmed20164-s13.pdf [file npjgenmed20164-s13.pdf]

Fig S11

**Novel target genes of HPV integration and their functional implication.**

|                        |                                                                                           |
|------------------------|-------------------------------------------------------------------------------------------|
| Transcription:         | <b><i>MED4; ZNF341; ZRANB2; ZFPM2; ZBTP18; AFF3; BCL6; BCL2L1; HES1; CCAT1; CCAT2</i></b> |
| Proliferation :        | <b><i>NUDT15; AKT3; SST; ID1; RB1; LPAR6; MAPK10</i></b>                                  |
| Oncogenesis:           | <b><i>RAB11A ; RAB22A</i></b>                                                             |
| Microtubules:          | <b><i>MAST4 ; MAP2</i></b>                                                                |
| Kinetochores:          | <b><i>CENPW</i></b>                                                                       |
| Cell adhesion:         | <b><i>LPP; NEGR1</i></b>                                                                  |
| Angiogenesis:          | <b><i>PF4V1</i></b>                                                                       |
| Extra-cellular matrix: | <b><i>MMP12; COL4A4 ; NID1</i></b>                                                        |
| Cell metabolism:       | <b><i>VPS54</i></b>                                                                       |
