# Supplementary material for: Mechanistic signatures of HPV insertions in cervical carcinomas
Source: PubMed Central journal article supplement (PMC5685317; doi:10.1038/npjgenmed.2016.4), 2016-03-16

Fig S12

|       | HPV18 | HPV45 | HPV31 | HPV73 | HPV33 | HPV16 | HPV51 | HPV52 |
|-------|-------|-------|-------|-------|-------|-------|-------|-------|
| HPV18 | 100,0 | 81,9  | 66,8  | 64,8  | 64,3  | 64,3  | 65,2  | 63,7  |
| HPV45 |       | 100,0 | 66,7  | 65,0  | 64,3  | 64,6  | 65,2  | 63,6  |
| HPV31 |       |       | 100,0 | 67,1  | 68,9  | 73,4  | 64,3  | 67,6  |
| HPV73 |       |       |       | 100,0 | 66,2  | 66,8  | 63,8  | 64,9  |
| HPV33 |       |       |       |       | 100,0 | 69,1  | 63,7  | 73,1  |
| HPV16 |       |       |       |       |       | 100,0 | 63,8  | 67,6  |
| HPV51 |       |       |       |       |       |       | 100,0 | 63,0  |
| HPV52 |       |       |       |       |       |       |       | 100,0 |

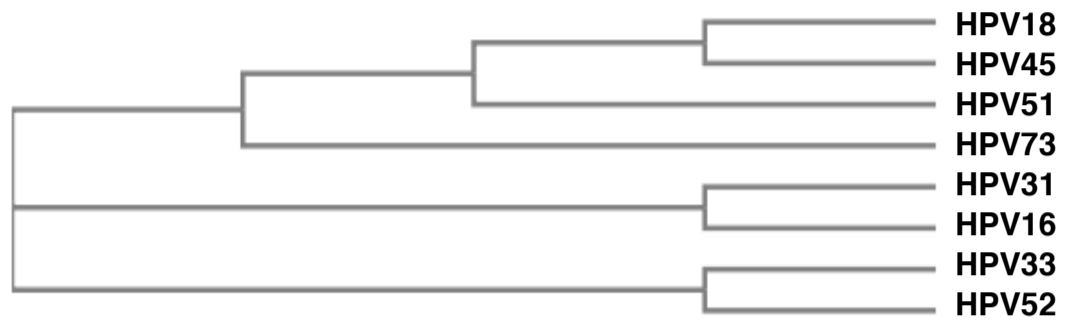

Supplement: npjgenmed20164-s14.pdf [file npjgenmed20164-s14.pdf]
